# Supplementary material
Source: Royal Society of Chemistry journal article supplement (doi:10.1039/d6cp00674d)
Supplement: d6cp00674d1.pdf [file d6cp00674d1.pdf]

Supplementary information for:  
***Ab initio* insights into plasmonic and strong-field contributions to H<sub>2</sub> dissociation on silver nanoshells**

Natalia E. Koval,<sup>\*a</sup> J. Iñaki Juaristi,<sup>b,a,c</sup> and Maite Alducin<sup>\*a,c</sup>

<sup>a</sup> Centro de Física de Materiales CFM/MPC (CSIC-EHU), Paseo Manuel de Lardizabal 5, 20018 Donostia-San Sebastián, Spain; E-mail: natalia.koval@ehu.eus

<sup>b</sup> Departamento de Polímeros y Materiales Avanzados: Física, Química y Tecnología, Facultad de Química (EHU), Apartado 1072, 20080 Donostia-San Sebastián, Spain

<sup>c</sup> Donostia International Physics Center (DIPC), Paseo Manuel de Lardizabal 4, 20018 Donostia-San Sebastián, Spain

## S1 Gaussian pulses used in TDDFT-ED simulations

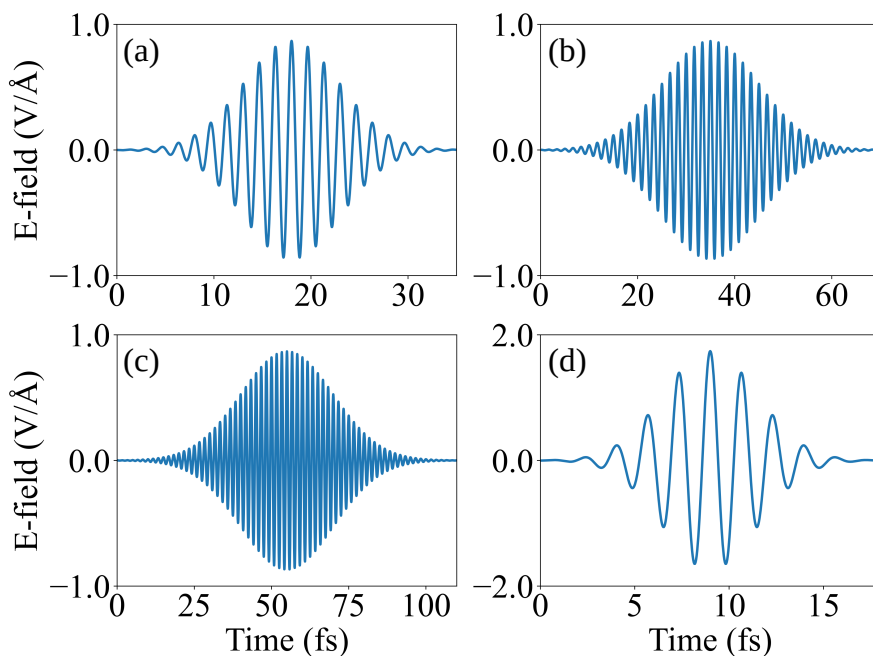

Figure S1: Electric field strength as a function of time for the four pulses used in this work (all four shown at plasmon frequency  $\hbar\omega = \hbar\omega_p = 2.48$  eV): (a) pulse-1:  $I_{\max} = 2 \times 10^{13}$  W cm<sup>-2</sup> ( $E_0 = 0.87$  V Å<sup>-1</sup>),  $t_0 = 18$  fs,  $\sigma = 5$  fs, (b) pulse-2:  $I_{\max} = 2 \times 10^{13}$  W cm<sup>-2</sup>,  $t_0 = 35$  fs,  $\sigma = 10$  fs, (c) pulse-3:  $I_{\max} = 2 \times 10^{13}$  W cm<sup>-2</sup>,  $t_0 = 55$  fs,  $\sigma = 15$  fs, (d) pulse-4:  $I_{\max} = 8 \times 10^{13}$  W cm<sup>-2</sup> ( $E_0 = 1.74$  V Å<sup>-1</sup>),  $t_0 = 9$  fs,  $\sigma = 2.5$  fs.

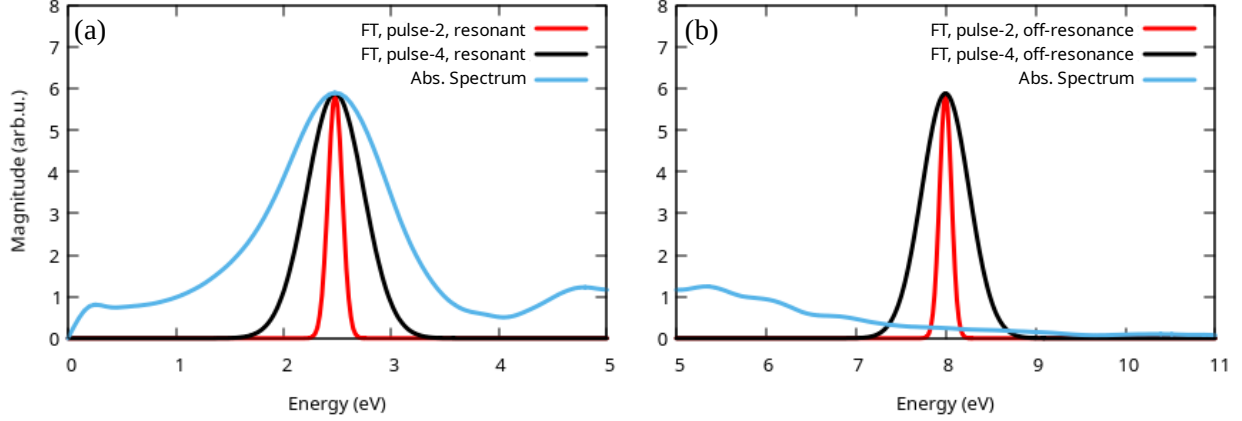

Figure S2: Spectral width obtained as a Fourier transform (FT) of the two pulses, pulse-2 ( $\sigma = 10$  fs) and pulse-4 ( $\sigma = 2.5$  fs) at (a) resonant frequency 2.48 eV, and (b) off-resonance frequency 8 eV, and compared to the absorption spectrum of the system. All the maxima are set to the same height.

## S2 Induced dipole moment at low intensity

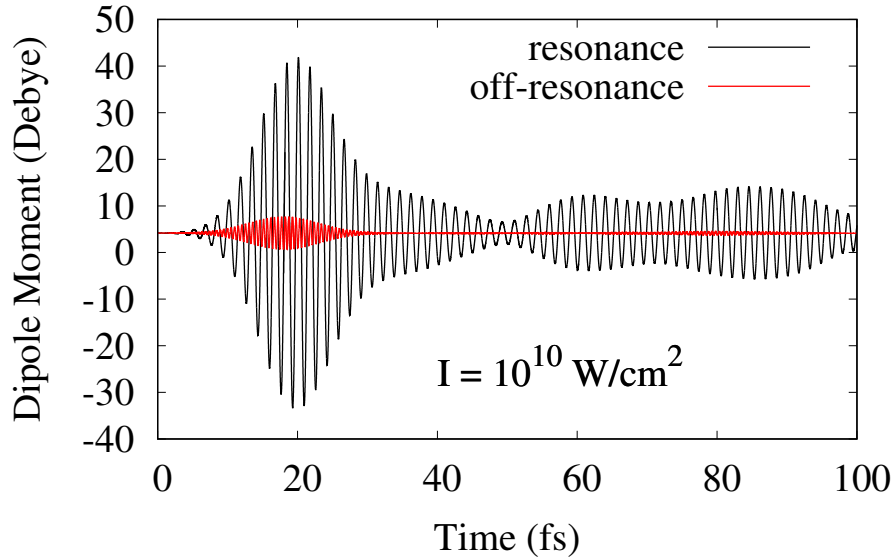

Figure S3: Time-dependent dipole moment induced in the  $\text{Ag}_{231}^{L1}$  nanoshell with  $\text{H}_2$  adsorbate by the external pulse with intensity  $I_{\text{max}} = 2 \times 10^{10} \text{ W cm}^{-2}$  and frequencies 2.48 eV (resonant condition) and 8 eV (off-resonance). The Gaussian pulse parameters are:  $t_0 = 18$  fs,  $\sigma = 5$  fs.

### S3 Selected molecular orbitals

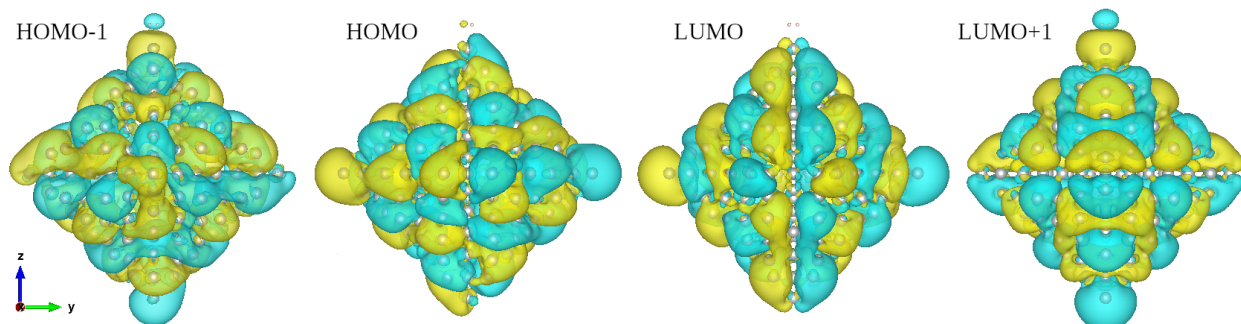

Figure S4: Ground-state molecular orbitals for the  $\text{Ag}_{231}^{L1}$  nanoshell with  $\text{H}_2$  adsorbate.

### S4 $\text{H}_2$ dissociation energy: gas-phase vs adsorbed

Figure S5 shows the potential energy as a function of the H-H internuclear distance for  $\text{H}_2$  in gas-phase and  $\text{H}_2$  adsorbed on the  $\text{Ag}_{231}^{L1}$  nanoshell. The energy is calculated using density functional theory (DFT) and the PBE exchange correlation functional with the CP2K software package. The calculated results are shown as symbols, while the extrapolated data is shown as lines. The potential energy at small (large) internuclear distances were calculated for a singlet (triplet) spin state of  $\text{H}_2$  using unrestricted Kohn-Sham DFT with a spin multiplicity of 1 (3). For the triplet state of the adsorbed molecule, constrained DFT was employed to enforce the localization of spin-polarized electrons on the hydrogen atoms, ensuring a proper triplet configuration at large internuclear distances. The transition between the two spin states was captured by interpolating the energy using Akima spline extrapolation, providing a smooth transition between the singlet and triplet states.

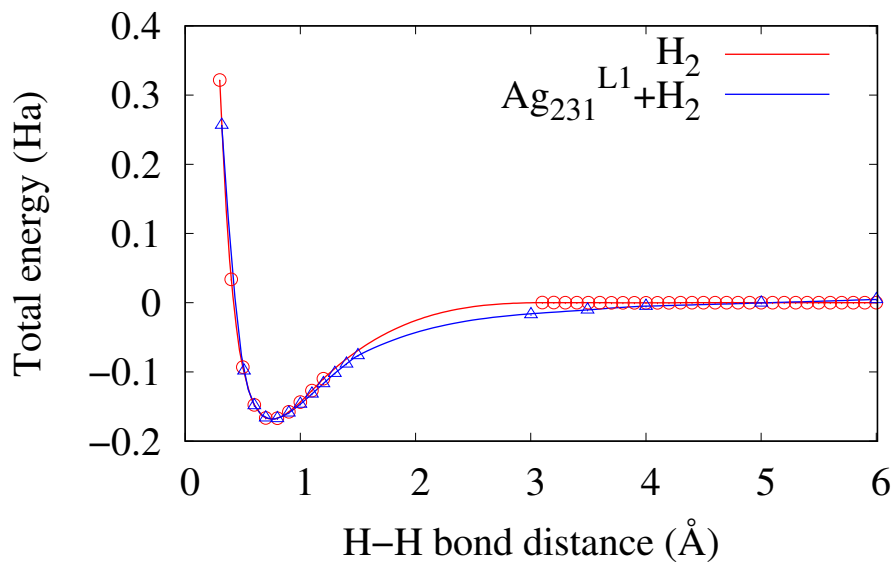

Figure S5: Potential energy (in Hartree units) as a function of the H-H internuclear distance for H<sub>2</sub> in gas-phase (red circles) and adsorbed on Ag<sub>231</sub><sup>L1</sup> (blue triangles). Symbols show the DFT+PBE energies and lines represent the extrapolation of the calculated data.

## S5 Population change on Ag<sub>231</sub><sup>L1</sup> under pulses-1,-2,-3

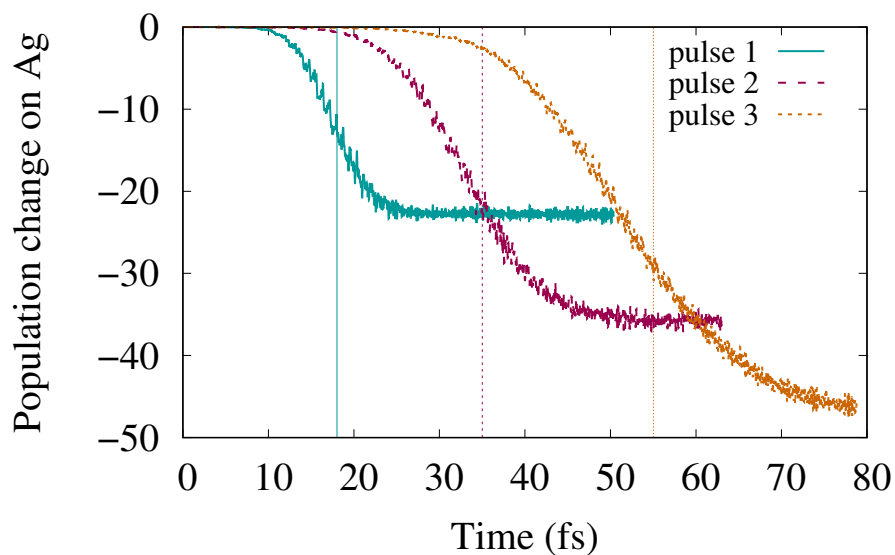

Figure S6: Mulliken population change [ $\Delta N_e = N_e(t) - N_e(t = 0)$ ] on Ag<sub>231</sub><sup>L1</sup> nanoshell as a function of time for pulse-1, pulse-2, and pulse-3 (see pulses details in Fig. S1a-c) at frequency 2.48 eV.

## S6 Dipole moment under pulse-4

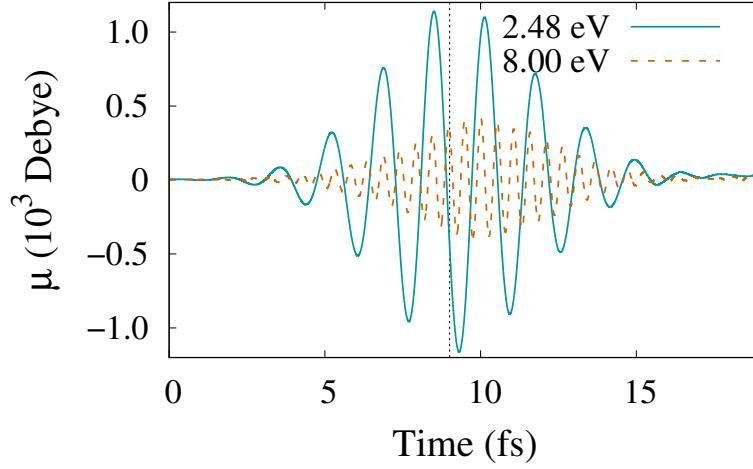

Figure S7: Time-dependent dipole moment for the  $\text{Ag}_{231}^{L1}$  nanoshell with  $\text{H}_2$  adsorbate under the external pulse-4 with intensity  $I_{\text{max}} = 8 \times 10^{13} \text{ W cm}^{-2}$  and both frequencies. The vertical line shows the pulse maximum.

## S7 $\text{H}_2$ -Ag distance and population change on $\text{Ag}_{231}^{L1}$ for pulses 2 and 4

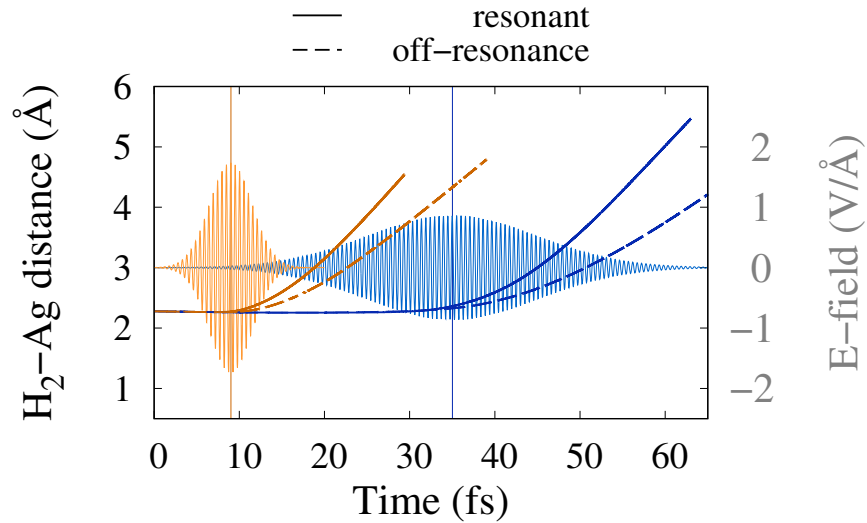

Figure S8: Time-dependent distance from the center of mass of  $\text{H}_2$  to the top Ag atom of the  $\text{Ag}_{231}^{L1}$  nanoshell for pulse-2 (blue lines) and pulse-4 (orange lines) at frequencies  $\hbar\omega = \hbar\omega_p = 2.48 \text{ eV}$  (solid lines) and  $\hbar\omega = 8 \text{ eV}$  (dashed lines). Right-side Y-axis shows the field strength for the pulses. Note that  $\text{H}_2$  dissociates in all the cases except for the off-resonant pulse-2 (see Fig. 5a of the main text).

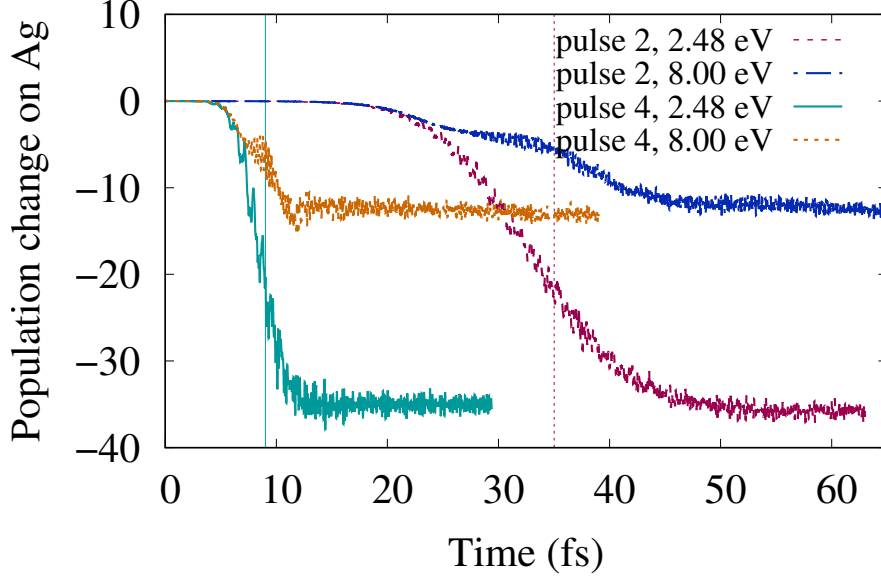

Figure S9: Mulliken population change  $[\Delta N_e = N_e(t) - N_e(t = 0)]$  on  $\text{Ag}_{231}^{L1}$  nanoshell as a function of time for pulse-4 compared to pulse-2 (see pulses details in Fig. S1b,d) at frequencies  $\hbar\omega = \hbar\omega_p = 2.48$  eV and  $\hbar\omega = 8$  eV.

## S8 Calculation of the induced electric field on $\text{Ag}_{231}^{L1} + \text{H}_2$

The induced charge density  $\rho_{\text{ind}}(\mathbf{r})$  generates an electrostatic potential  $\Phi_{\text{ind}}(\mathbf{r})$  governed by Poisson's equation:

$$\nabla^2 \Phi_{\text{ind}}(\mathbf{r}) = -4\pi \rho_{\text{ind}}(\mathbf{r}), \quad (1)$$

where  $\epsilon_0$  is the vacuum permittivity. To solve this equation efficiently, we transform it into Fourier space. Taking the Fourier transform:

$$\mathcal{F} [\nabla^2 \Phi_{\text{ind}}(\mathbf{r})] = -4\pi \mathcal{F} [\rho_{\text{ind}}(\mathbf{r})]. \quad (2)$$

Since the Fourier transform of the Laplacian is  $-\mathbf{k}^2$ , we obtain:

$$\tilde{\Phi}_{\text{ind}}(\mathbf{k}) = \frac{4\pi \tilde{\rho}_{\text{ind}}(\mathbf{k})}{k^2}, \quad (3)$$

where  $\mathbf{k} = (k_x, k_y, k_z)$  is the wavevector, and  $k^2 = k_x^2 + k_y^2 + k_z^2$ .

The induced electric field is then given by:

$$\mathbf{E}_{\text{ind}}(\mathbf{r}) = -\nabla \Phi_{\text{ind}}(\mathbf{r}), \quad (4)$$

which, in Fourier space, becomes:

$$\tilde{\mathbf{E}}_{\text{ind}}(\mathbf{k}) = -i\mathbf{k} \tilde{\Phi}_{\text{ind}}(\mathbf{k}). \quad (5)$$

Substituting  $\tilde{\Phi}_{\text{ind}}(\mathbf{k})$ :

$$\tilde{\mathbf{E}}_{\text{ind}}(\mathbf{k}) = -i\mathbf{k} \frac{4\pi \tilde{\rho}_{\text{ind}}(\mathbf{k})}{k^2}. \quad (6)$$

To avoid division by zero at  $\mathbf{k} = 0$ , we set  $k^2 = 1$  at that point.

Finally, the induced field in real space is obtained via the inverse Fourier transform:

$$\mathbf{E}_{\text{ind}}(\mathbf{r}) = \mathcal{F}^{-1} \left[ \tilde{\mathbf{E}}_{\text{ind}}(\mathbf{k}) \right]. \quad (7)$$

Figure S10 shows the induced electric field on the  $\text{Ag}_{231}^{L1}$  nanoshell with  $\text{H}_2$  adsorbate under the external pulse-1 with intensity  $I_{\text{max}} = 2 \times 10^{13} \text{ W cm}^{-2}$  and frequencies (left) 2.48 eV and (right) 8 eV at the time instant  $t = 10 \text{ fs}$ . These results are obtained from the RT-TDDFT-ED calculations for the structures surrounded by the layer of ghost atoms. We show the mean over the  $x$ -axis induced field in the  $yz$ -plane. At the plasmon resonance (2.48 eV), the nanoparticle's collective oscillation strongly amplifies the external field, producing hot spots on the nanoshell vertices, with induced electric field in the vicinity of the  $\text{H}_2$  molecule reaching  $0.25 \text{ V \AA}^{-1}$ . In contrast, at the off-resonant excitation energy (8 eV), the particle's polarizability is much weaker and its induced field is largely out of phase with the driving field. As a result, there is a much weaker induced field at the  $\text{H}_2$  location, reaching only about  $0.05 \text{ V \AA}^{-1}$ , five time weaker than in the case of the resonant frequency.

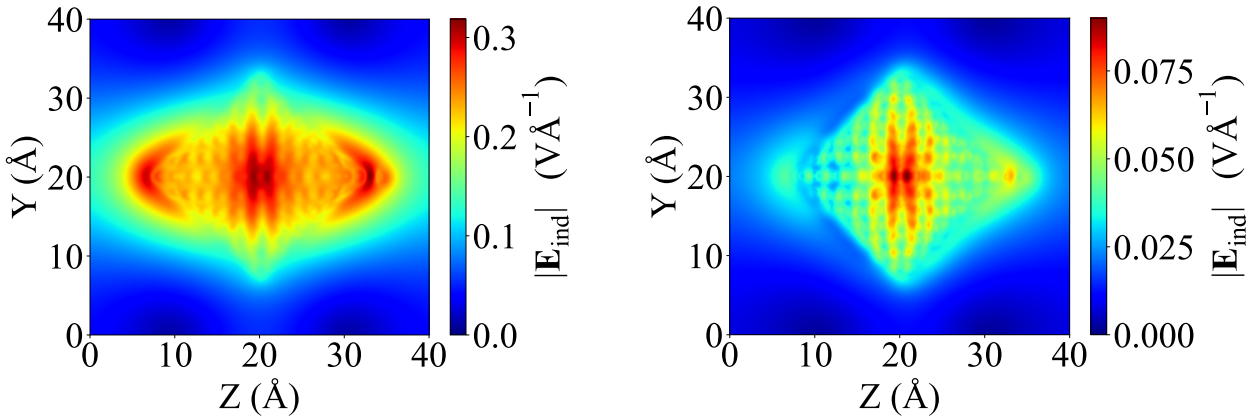

Figure S10:  $(z, y)$ -distribution of the  $x$ -averaged induced electric field  $\langle \|\mathbf{E}_{\text{ind}}(y, z)\| \rangle_x$  on the  $\text{Ag}_{231}^{L1}$  nanoshell with  $\text{H}_2$  adsorbed on the right vertex under the external pulse-1 with intensity  $I_{\text{max}} = 2 \times 10^{13} \text{ W cm}^{-2}$  and frequencies (left) 2.48 eV and (right) 8 eV at the time instant  $t = 10 \text{ fs}$ . External field is polarized along the  $z$ -axis. Notice different scale.

The electron oscillations due to plasmon translate into a symmetrical induced field distribution around both vertices along the  $z$ -axis in Fig. S10(left) due to the fact that we show the modulus  $\langle \|\mathbf{E}_{\text{ind}}\| \rangle_x$ . Since strong field of the pulses leads to the superposition of both plasmonic and nonlinear effects such as ionization, the observed symmetry is lost at the time instances when the nanoshell has lost electrons (Figs. S13, S14, S17, S18, and S21 below). The emitted electrons occupy ghost atoms in the time-dependent density, while all the electrons are on the  $\text{Ag}_{231}^{L1} + \text{H}_2$  in the ground-state density (for the current snapshot atomic structure) which we subtract to find the induced density. This means that the positive electron change on one vertex will be smaller than the negative electron change on the other vertex by the number of emitted electrons.

## S9 External electric field and induced dipole moment for pulses 2 and 4

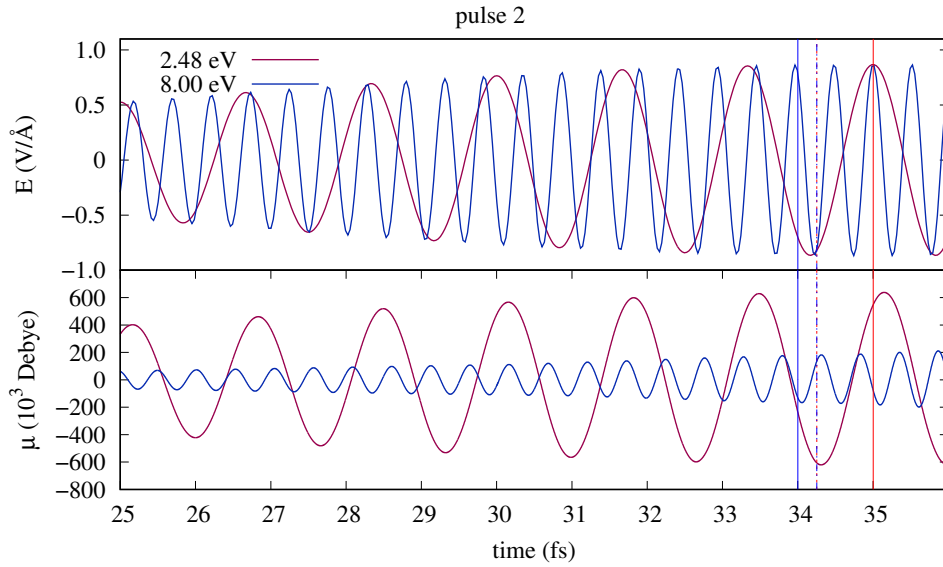

Figure S11: Upper panel: Electric field strength for pulse-2 with frequencies 2.48 eV (resonant) and 8 eV (off-resonant). Lower panel: Corresponding induced dipole moment as a function of time. Vertical red (blue) lines show the time instances used for plotting the induced electric field at 2.48 eV (8 eV) in Fig. 6 of the main article and in Figs S13 to S16 below.

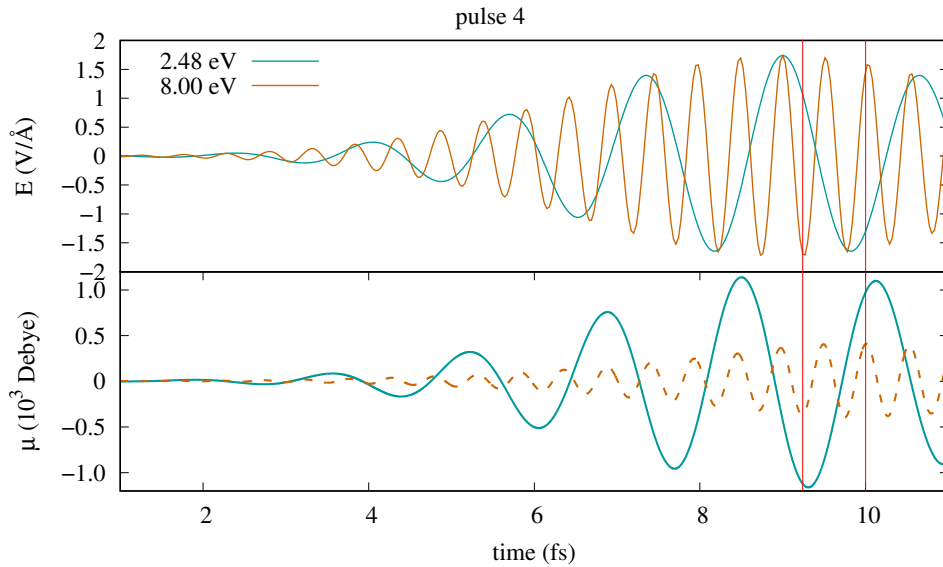

Figure S12: Same as Fig. S11 for pulse-4 corresponding to Fig. 7 of the main article and to Figs S17 to S20 below.

## S10 Induced electric field analysis at the position of H<sub>2</sub>

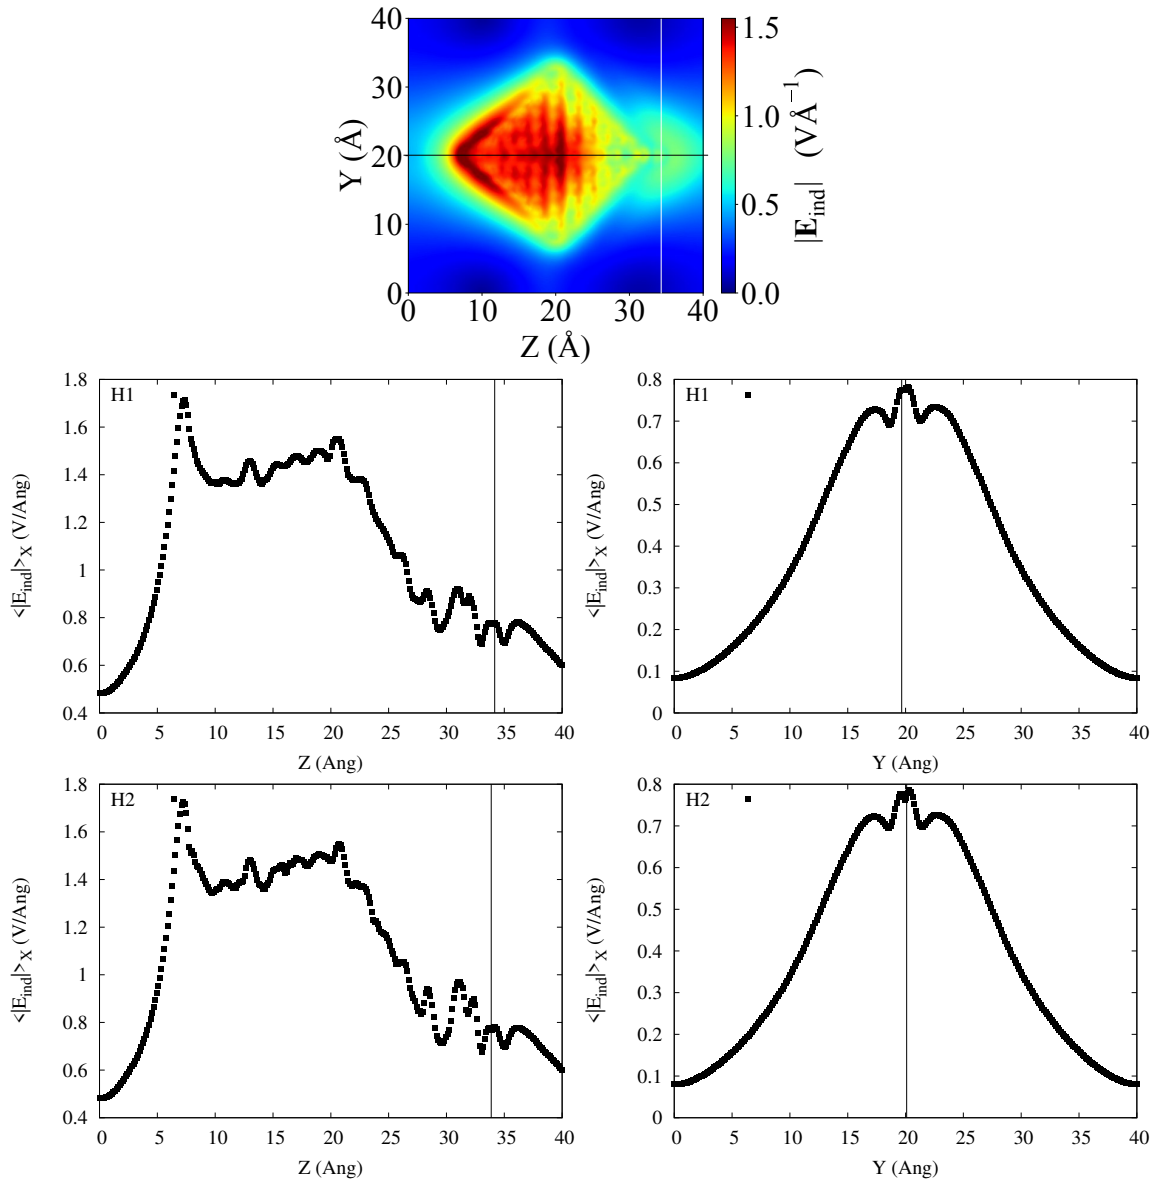

Figure S13:  $x$ -averaged electric field induced on  $\text{Ag}_{231}^{L1} + \text{H}_2$  by the external pulse-2 with frequency 2.48 eV at the time instant  $t = 34.25$  fs. The molecule is adsorbed on the right vertex. The Cartesian coordinates of the atoms forming the molecule, denoted as H1 and H2 in the figure, are (20.17091, 19.65791, 34.16472) and (19.41151, 20.09346, 33.86330), respectively. (Upper panel)  $(z, y)$ -distribution of the  $x$ -averaged induced electric field. Horizontal (vertical) black (white) line approximately shows the cut through H1 and H2 at their  $y$  ( $z$ ) positions, for which lower left (lower right) panels show the induced electric field as a function of  $z$  ( $y$ ).

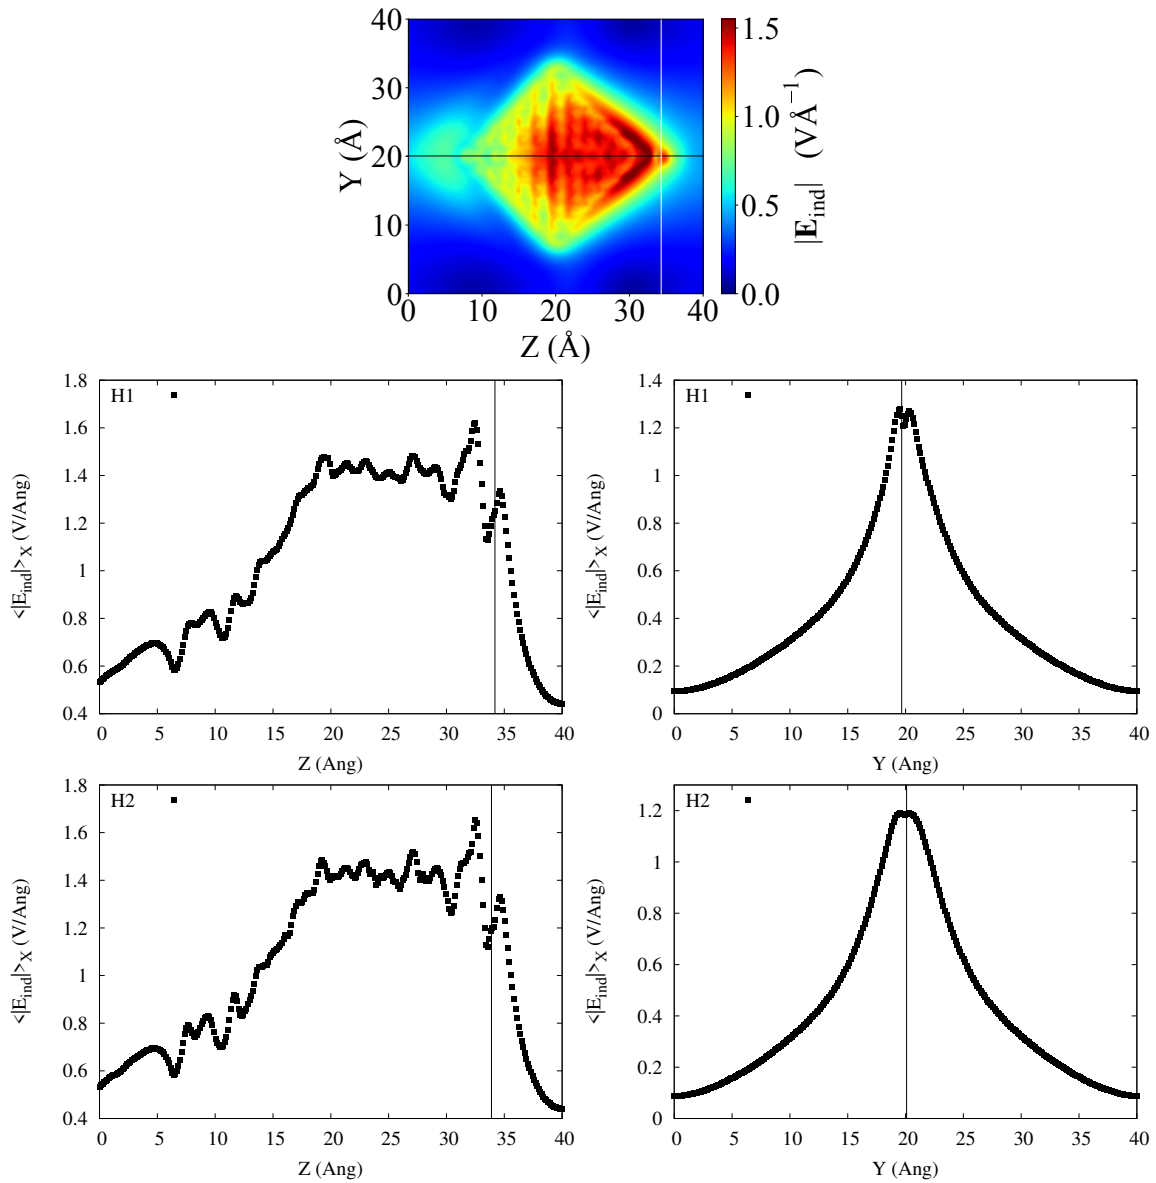

Figure S14: Same as Fig. S13 but for pulse-2 with frequency 2.48 eV at the time instant  $t = 35$  fs. The molecule Cartesian coordinates are H1: (20.16494 19.66330 34.18505) and H2: (19.39228, 20.08282, 33.88200).

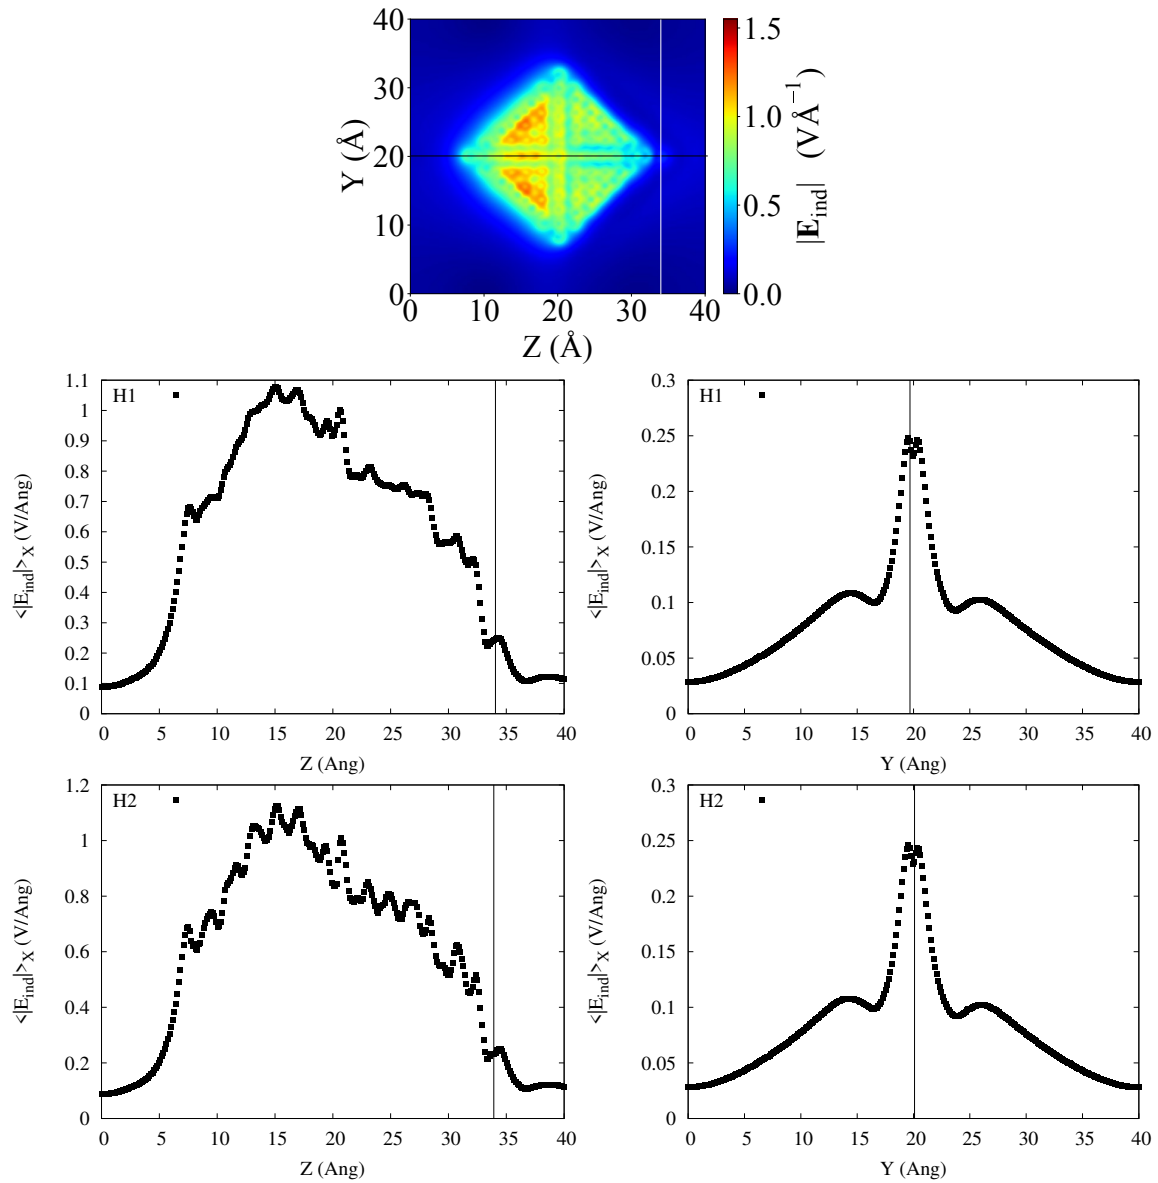

Figure S15: Same as Fig. S13 but for pulse-2 with frequency 8 eV at the time instant  $t = 34$  fs. The molecule Cartesian coordinates are H1: (20.13996, 19.67609, 34.05631) and H2: (19.45773, 20.08741, 33.91462).

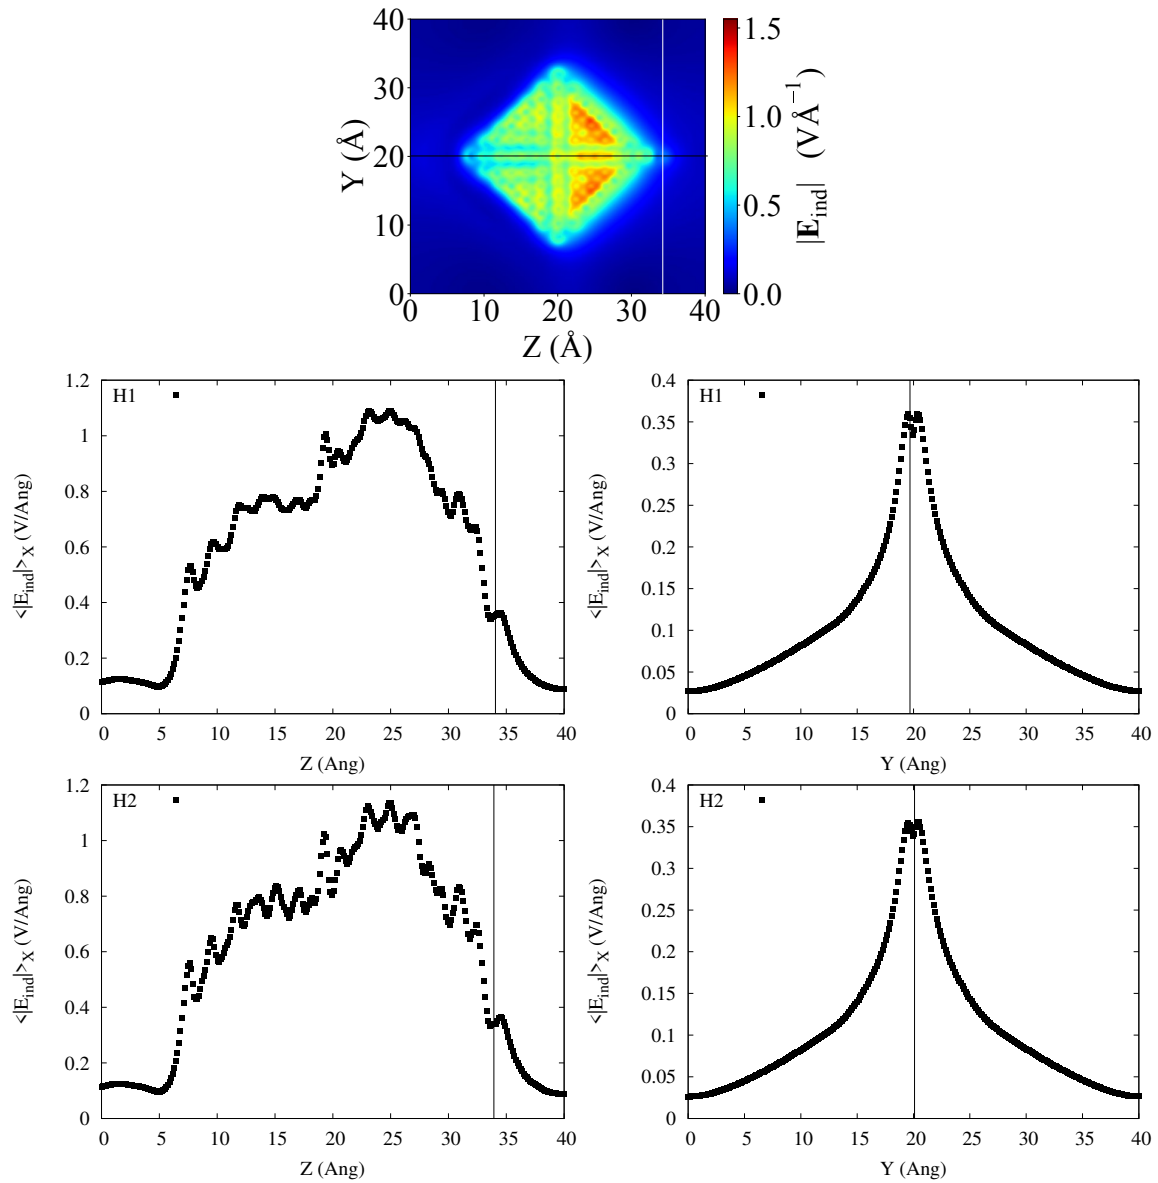

Figure S16: Same as Fig. S13 but for pulse-2 with frequency 8 eV at the time instant  $t = 34.25$  fs. The molecule Cartesian coordinates are H1: (20.13695, 19.67874, 34.05676) and H2: (19.45385, 20.08326, 33.91865).

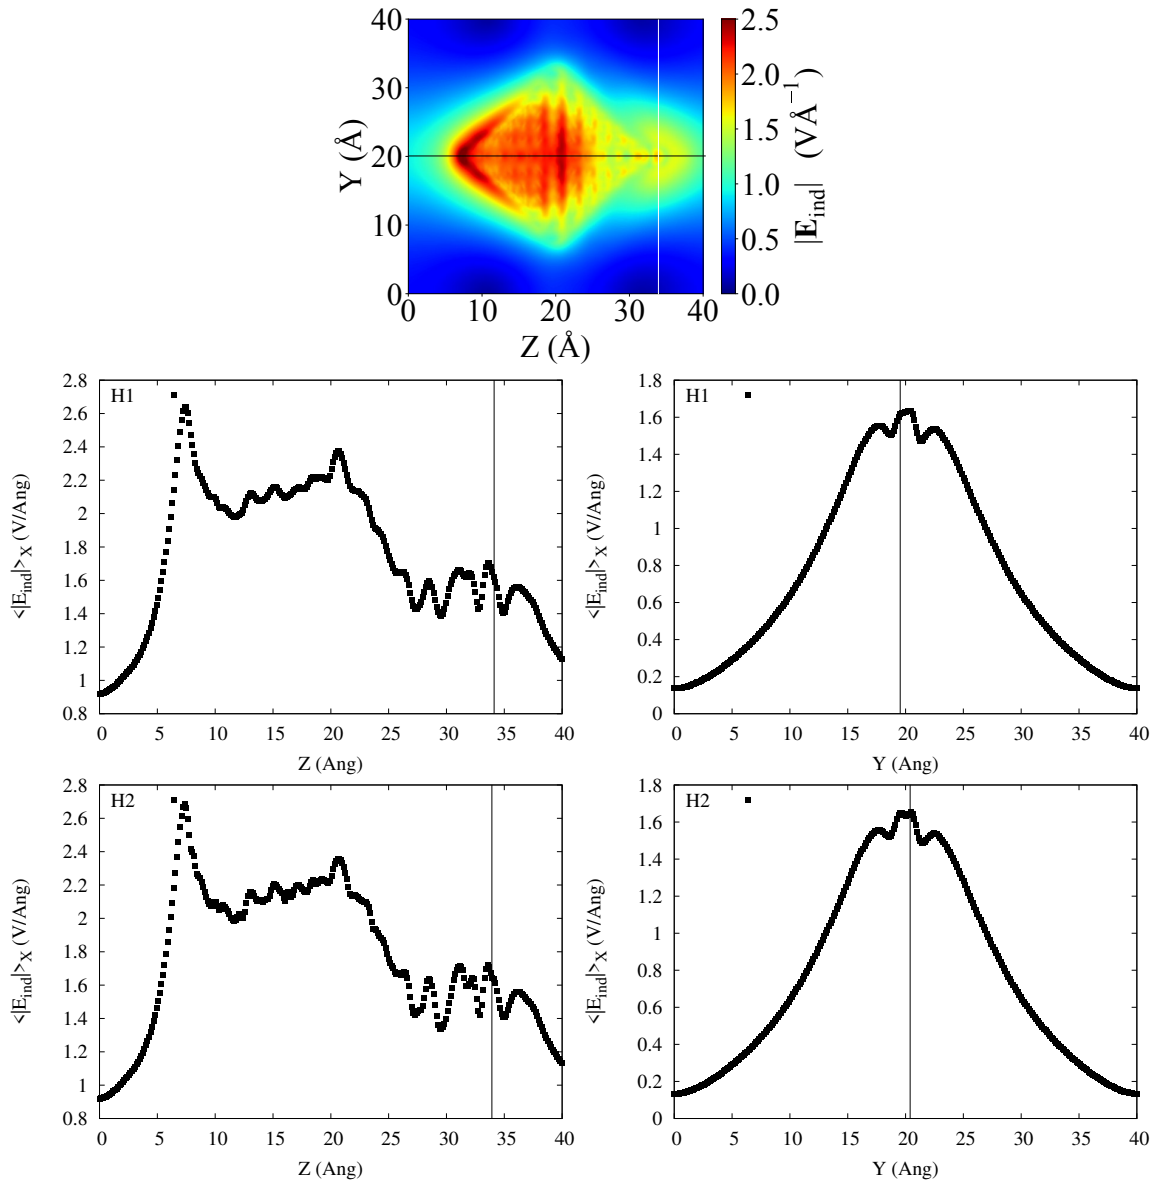

Figure S17: Same as Fig. S13 but for pulse-4 with frequency 2.48 eV at the time instant  $t = 9.24$  fs. The molecule Cartesian coordinates are H1: (20.17667, 19.53189, 34.10876) and H2: (20.04871, 20.39224, 33.92203).

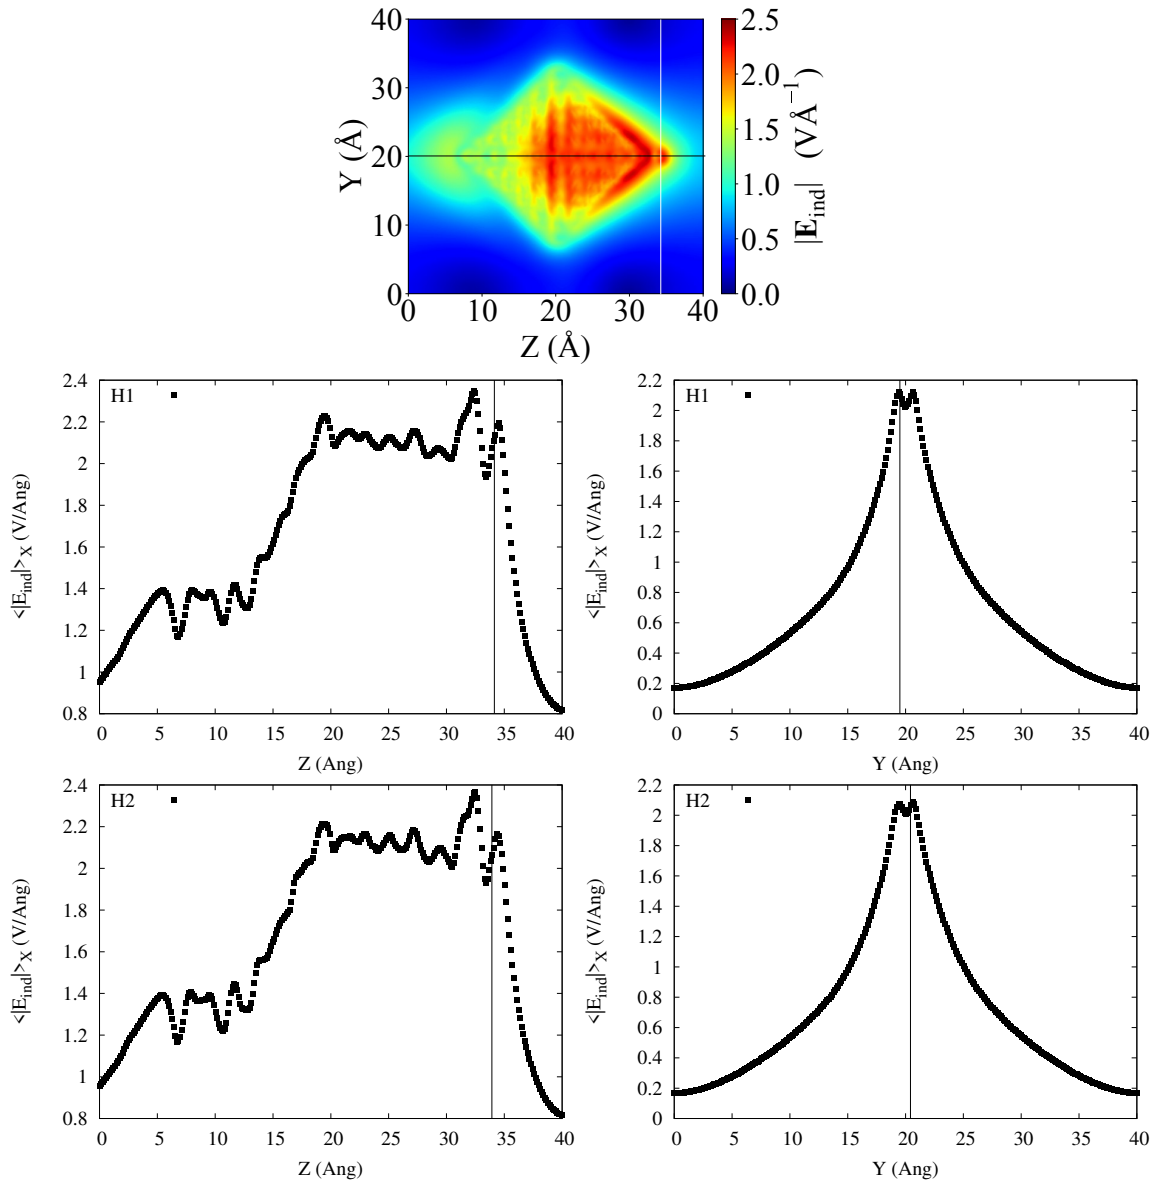

Figure S18: Same as Fig. S13 but for pulse-4 with frequency 2.48 eV at the time instant  $t = 10$  fs. The molecule Cartesian coordinates are H1: (20.18015, 19.49985, 34.13747) and H2: (20.02655, 20.42064, 33.92358).

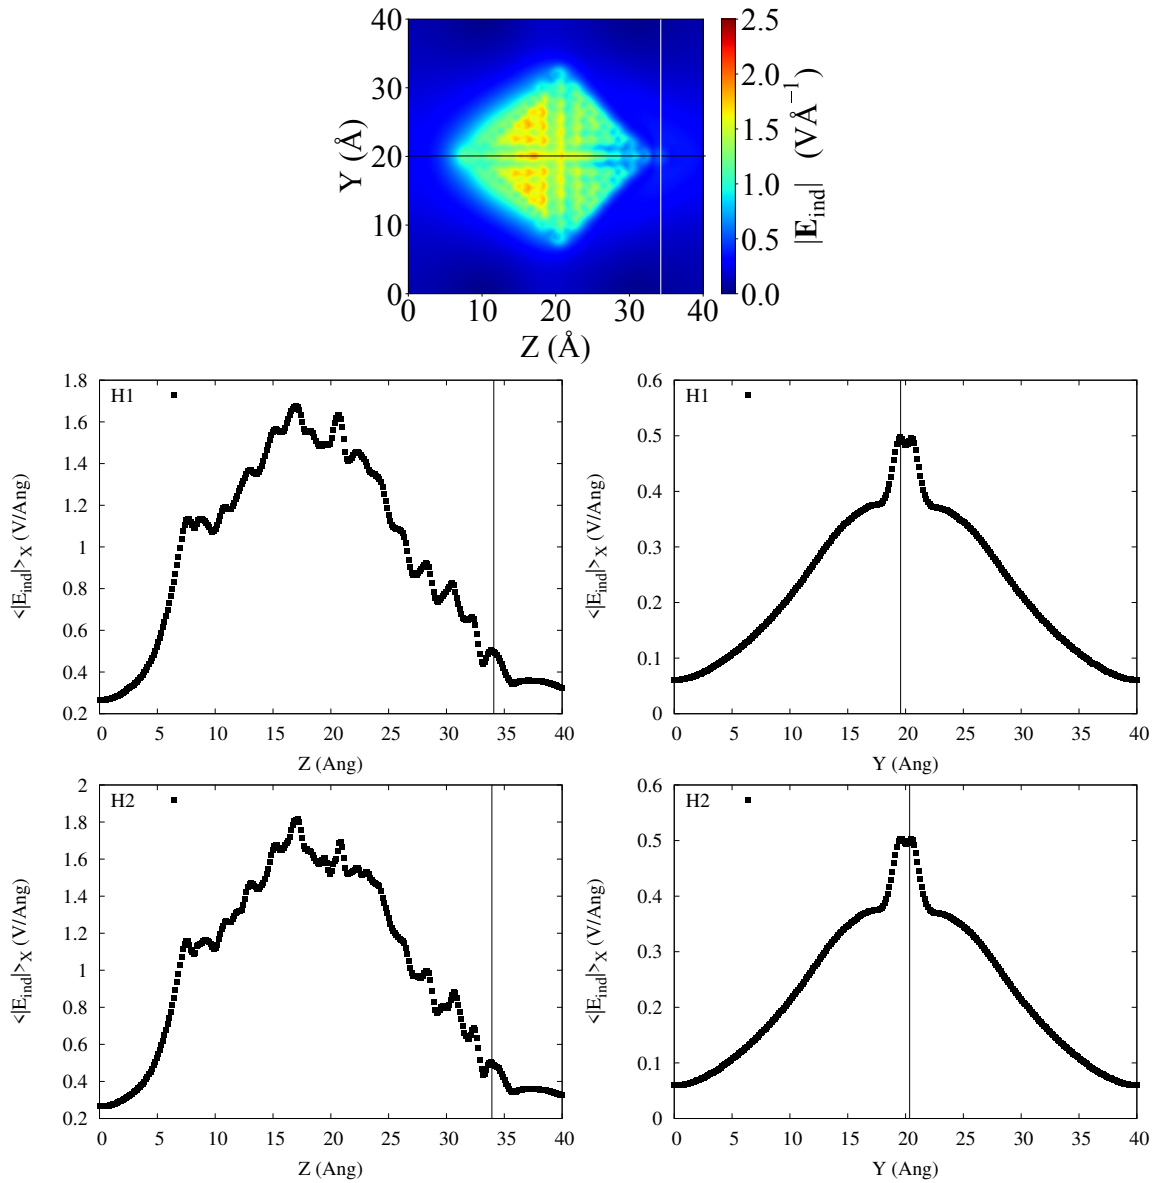

Figure S19: Same as Fig. S13 but for pulse-4 with frequency 8 eV at the time instant  $t = 9.24$  fs. The molecule Cartesian coordinates are H1: (20.17310, 19.56901, 34.08232) and H2: (20.05217, 20.35282, 33.92159).

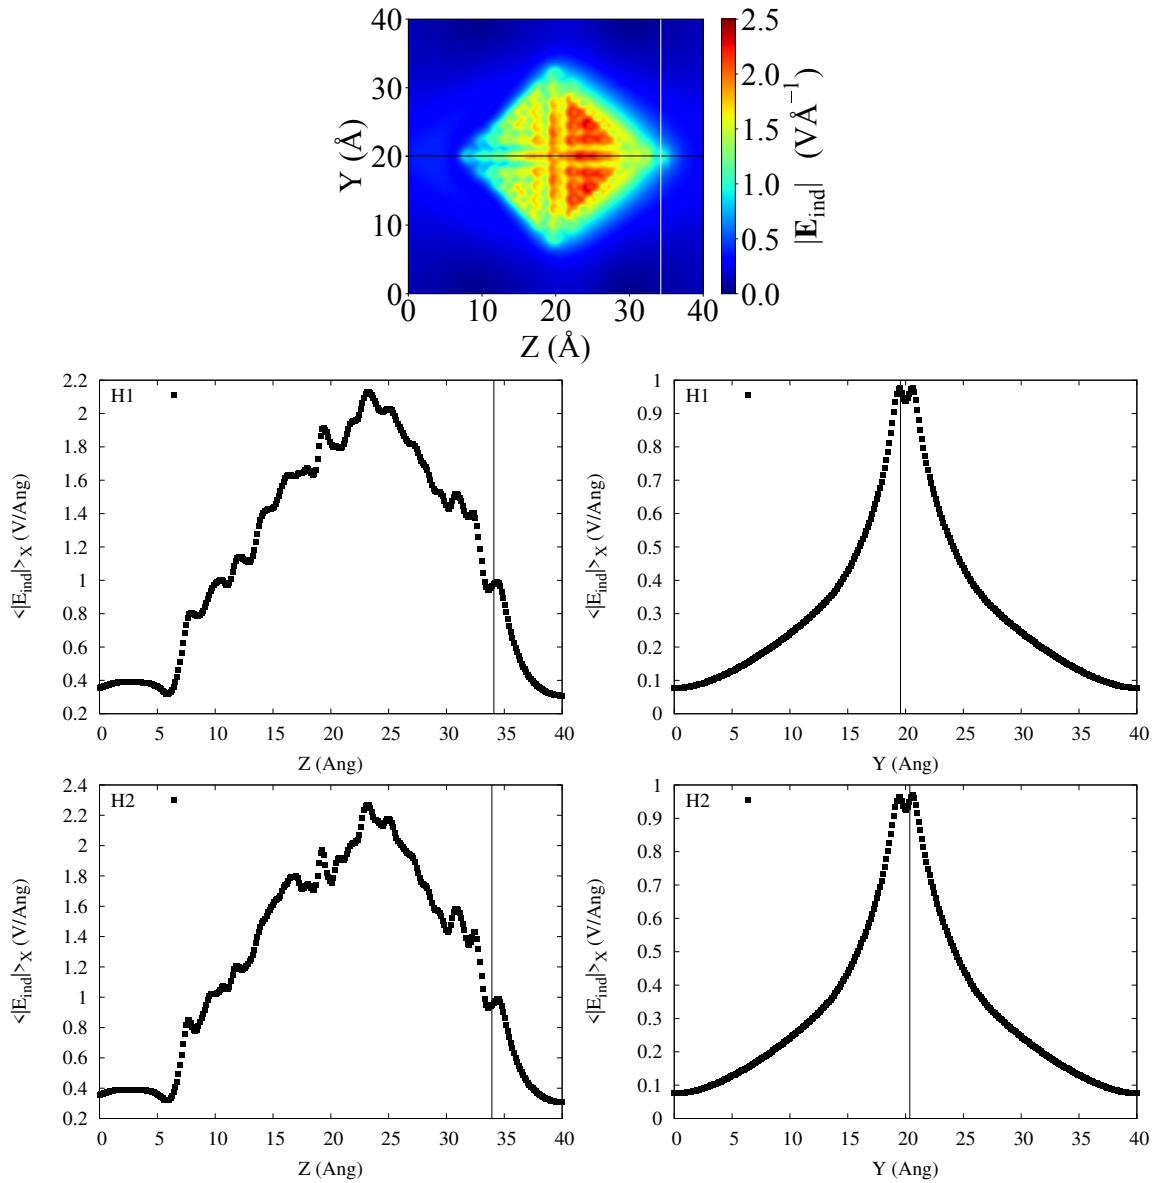

Figure S20: Same as Fig. S13 but for pulse-4 with frequency 8 eV at the time instant  $t = 10$  fs. The molecule Cartesian coordinates are H1: (20.17441, 19.55348, 34.09393) and H2: (20.03204, 20.36180, 33.91831).

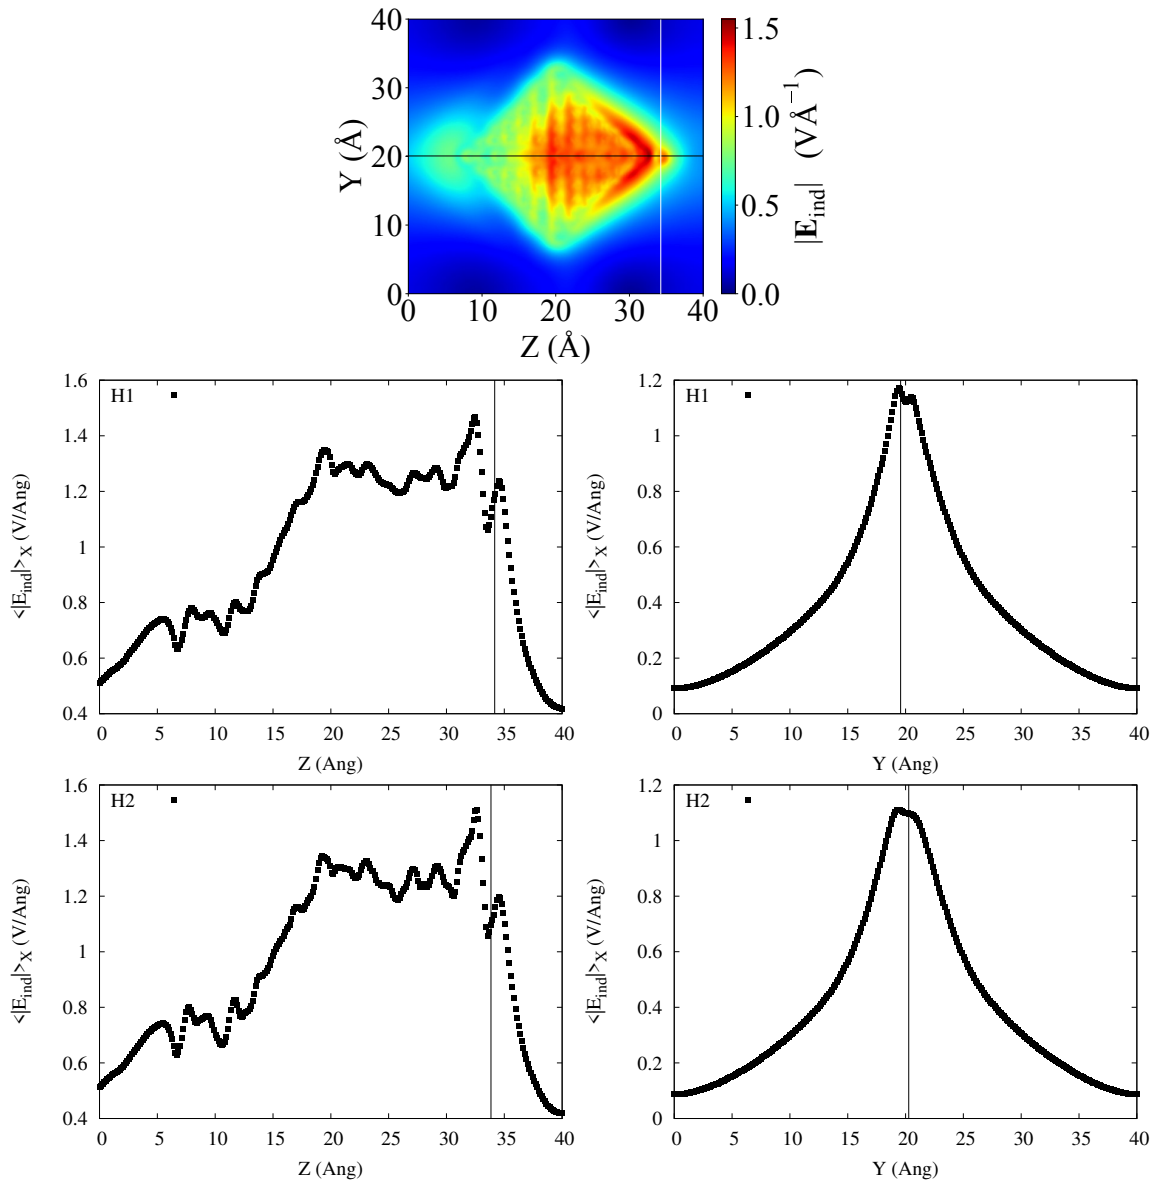

Figure S21: Same as Fig. S13 but for pulse-1 with frequency 2.48 eV at the time instant  $t = 20$  fs. The molecule Cartesian coordinates are H1: (20.17377, 19.56827, 34.15810) and H2: (19.77894, 20.27348, 33.84442).

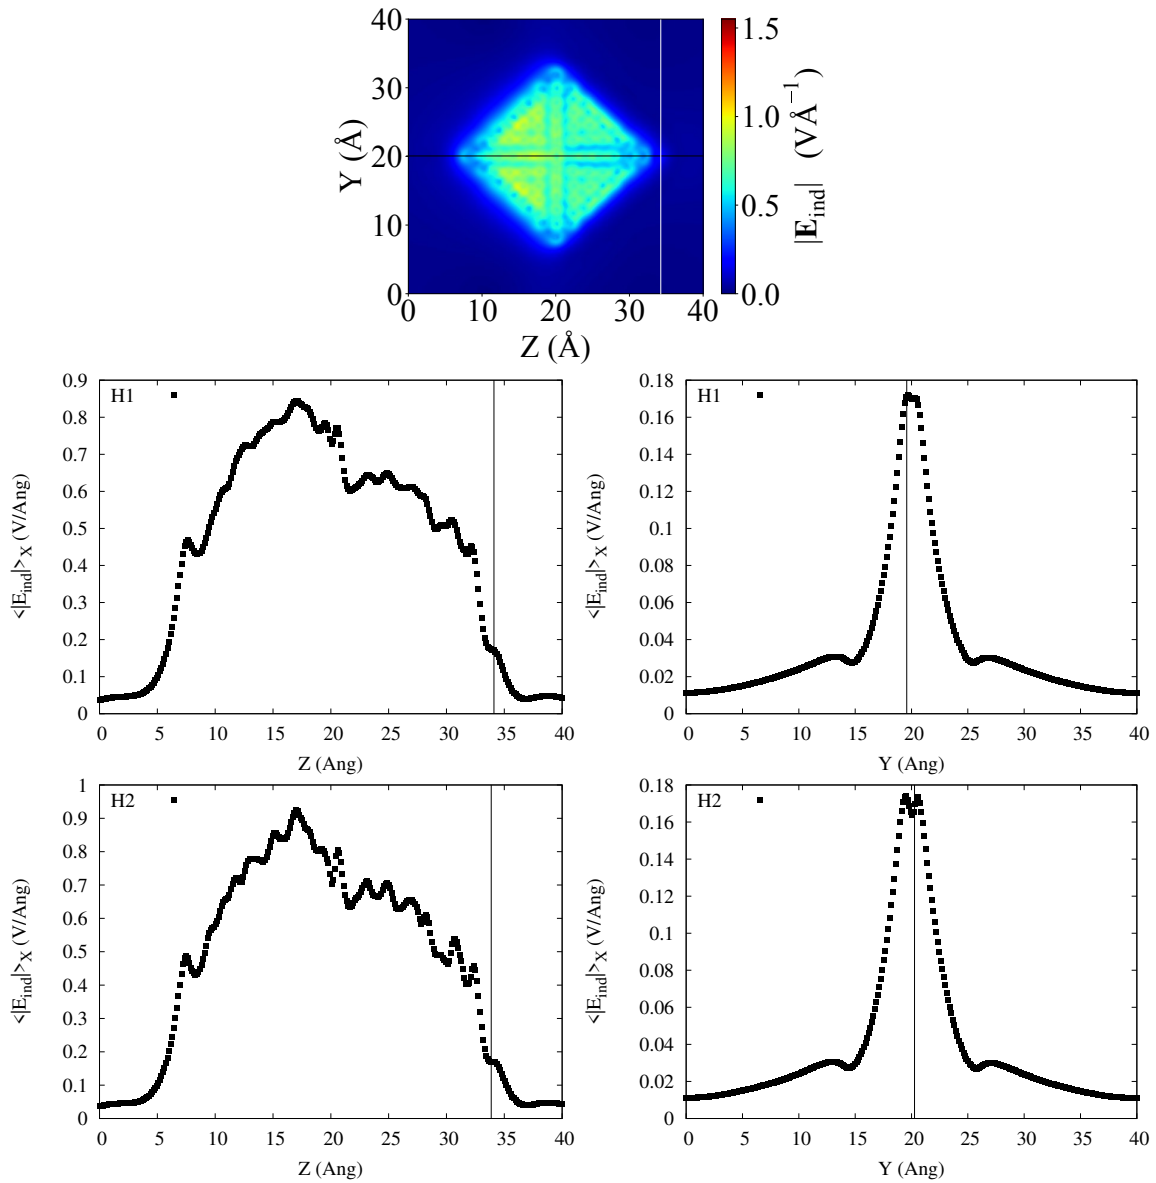

Figure S22: Same as Fig. S13 but for pulse-1 with frequency 8 eV at the time instant  $t = 20$  fs. The molecule Cartesian coordinates are H1: (20.17020, 19.57946, 34.10292) and H2: (19.78535, 20.26223, 33.86742).

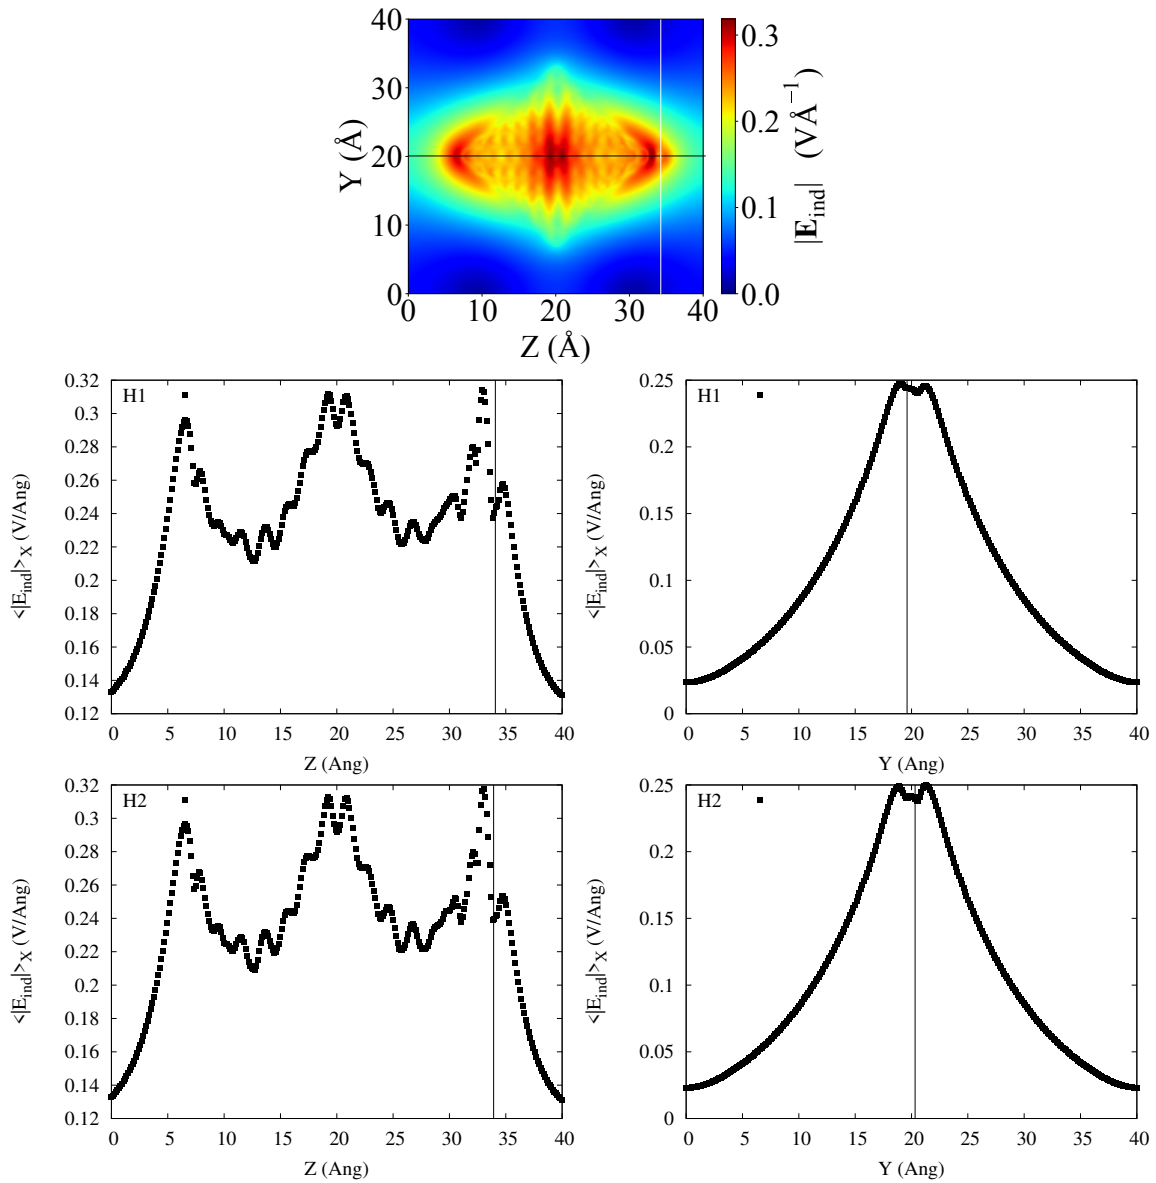

Figure S23: Same as Fig. S13 but for pulse-1 with frequency 2.48 eV at the time instant  $t = 10$  fs. The molecule Cartesian coordinates are H1: (20.17012, 19.60066, 34.07398) and H2: (20.03598, 20.31432, 33.91182).

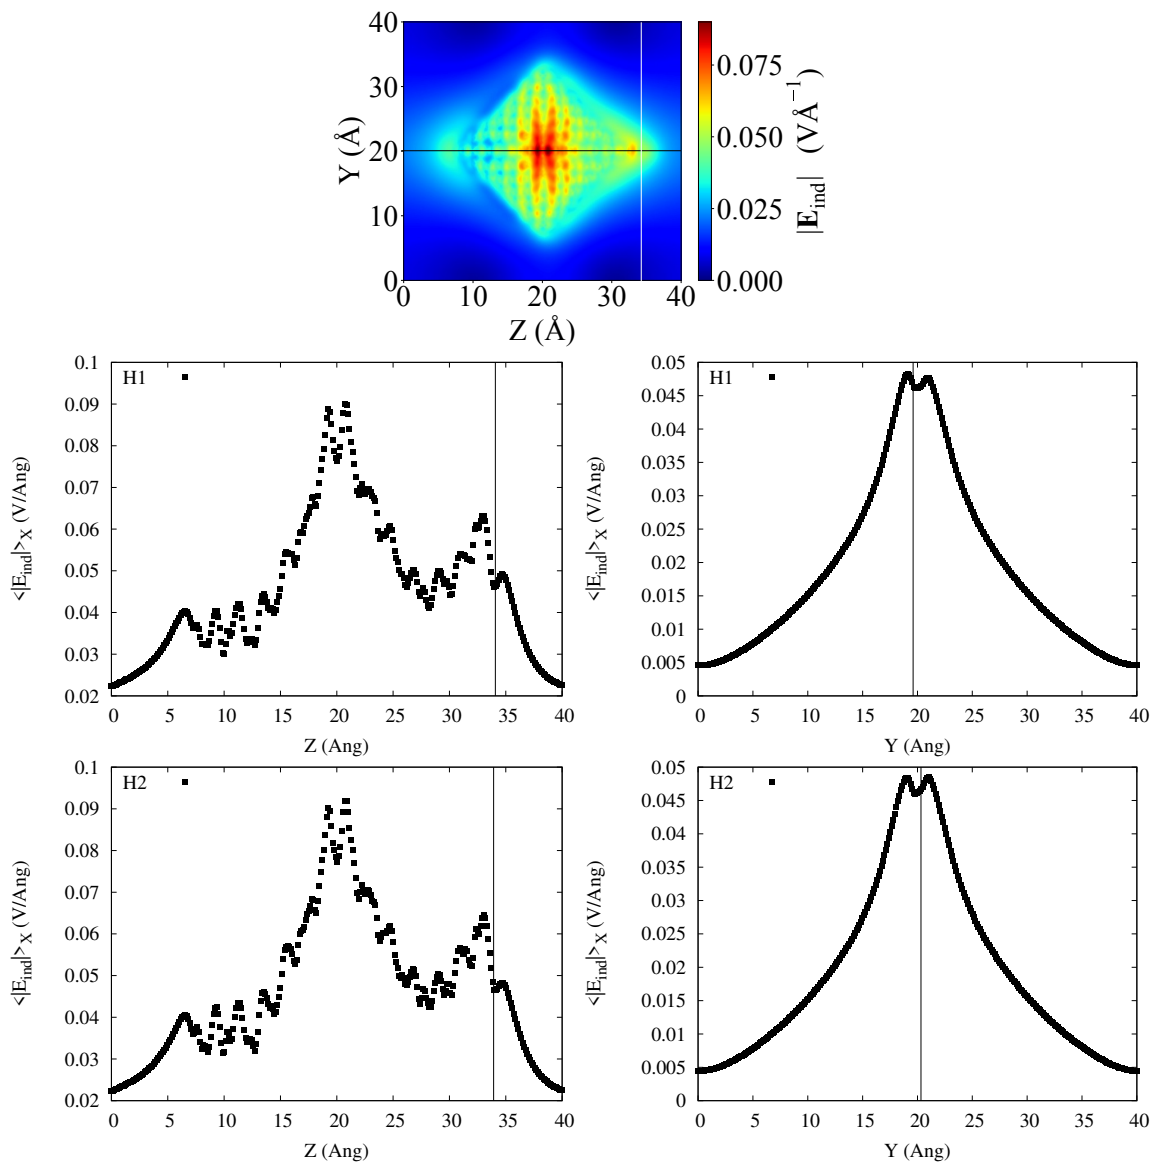

Figure S24: Same as Fig. S13 but for pulse-1 with frequency 8 eV at the time instant  $t = 10$  fs. The molecule Cartesian coordinates are H1: (20.17003, 19.60123, 34.07358) and H2: (20.03605, 20.31386, 33.91217).

## S11 Cartesian coordinates of the $\text{Ag}_{231}^{L1} + \text{H}_2$ with the ghost atomic layer

Below, the cartesian coordinates of the system studied in this work are presented in the Å units (XYZ format). The first column indicates the atomic species labels, where Ag\_g labels represent ghost atoms. The labels column is followed but the  $x$ ,  $y$ , and  $z$  coordinates.

406

Ag 10.3969324580 18.4704803605 19.9749733459  
Ag 9.8801398143 20.0022852738 17.6904280306  
Ag 8.0888818953 20.0024411773 19.9661760238  
Ag 9.8556055227 20.0016089713 22.2540382774  
Ag 10.3978188286 21.5330803014 19.9753907810  
Ag 14.2886254244 14.4888567043 19.9924349493  
Ag 11.7402234422 17.8383556081 17.6089306887  
Ag 13.6352454232 15.7706074735 17.5819324604  
Ag 13.5269919275 17.6297445297 15.4621406523  
Ag 12.3458745851 16.4772986766 19.9842201854  
Ag 11.6989611913 17.8219232675 22.3604611125  
Ag 13.6078006115 15.7654472226 22.3992529023  
Ag 13.4785233200 17.6281848211 24.5147023512  
Ag 14.1436803508 20.0013865510 14.0739738942  
Ag 12.0640398151 20.0016094902 15.8964524609  
Ag 11.7414159352 22.1648828099 17.6092539738  
Ag 13.5272995214 22.3731781996 15.4617026651  
Ag 11.6981893513 22.1818846868 22.3618166025  
Ag 12.0312307647 20.0014735977 24.0499984880  
Ag 14.0643951367 20.0010738844 25.9209190860  
Ag 13.4771370672 22.3750962462 24.5169470349  
Ag 13.6388776091 24.2301550132 17.5831828044  
Ag 12.3487427238 23.5240662974 19.9851331769  
Ag 13.6086928479 24.2367423285 22.4008273148  
Ag 14.2924551674 25.5114332611 19.9937634217  
Ag 17.8613920942 10.1968600653 20.0091246164  
Ag 15.5833951804 13.7595916313 17.6063098304  
Ag 17.6327325695 11.8275271298 17.7153300309  
Ag 17.5973572817 13.7201300116 15.6501444517  
Ag 16.1054697776 12.3628514861 19.9997203404  
Ag 15.5659524087 13.7638967259 22.3871670326  
Ag 17.6222898370 11.8433394721 22.2940101453  
Ag 17.5785553640 13.7515552124 24.3421728593  
Ag 15.5685586228 17.6231500519 13.5397269162  
Ag 17.5992348097 15.6819554995 13.6520342625  
Ag 17.6623079684 17.6744907698 11.6681230928  
Ag 15.4452894919 15.5452454280 15.4367815433

Ag 15.4081735825 15.5542970523 24.5532216470  
Ag 15.5002627634 17.6264323741 26.4579311622  
Ag 17.5728934575 15.7309048904 26.3211906509  
Ag 17.5959168744 17.6972556276 28.3280868666  
Ag 17.9687630717 20.0003788215 10.0782356772  
Ag 16.1364672231 20.0012298990 12.1546042066  
Ag 15.5681732197 22.3799444461 13.5385146442  
Ag 17.6619432191 22.3276815121 11.6668410117  
Ag 15.4994562590 22.3757058343 26.4598213858  
Ag 16.0389483499 20.0005404778 27.8575723089  
Ag 17.7972375005 19.9997184114 30.0050481369  
Ag 17.5956879009 22.3034157438 28.3293938547  
Ag 17.5989592720 24.3213350809 13.6497422430  
Ag 15.4461983646 24.4572988722 15.4361266637  
Ag 15.5870395016 26.2407002191 17.6074090800  
Ag 17.5976881884 26.2831832316 15.6479342060  
Ag 15.5671683337 26.2378924126 22.3892450548  
Ag 15.4076820718 24.4483737609 24.5559174465  
Ag 17.5726229605 24.2708769460 26.3236414934  
Ag 17.5786017421 26.2506890541 24.3451500946  
Ag 17.6342476449 28.1745087219 17.7145912110  
Ag 16.1101716773 27.6364694049 20.0009574387  
Ag 17.6230662931 28.1591105712 22.2970147056  
Ag 17.8661729710 29.8017229587 20.0098888082  
Ag 19.9665275763 10.2943560157 18.1476541743  
Ag 19.9312977659 8.2487443974 20.0217294263  
Ag 19.9615075155 10.3156131430 21.8713429548  
Ag 22.0610040189 10.0732678730 20.0132194210  
Ag 20.0059587165 14.3912915084 14.4007439375  
Ag 19.9859367859 12.3699752741 16.3030506070  
Ag 22.3545586352 11.6660913609 17.6843087284  
Ag 22.4110273407 13.6511226423 15.6919077545  
Ag 22.3477140845 11.6886112611 22.3288584313  
Ag 19.9742424689 12.4091106776 23.6962346435  
Ag 19.9877701409 14.4608583387 25.5717472620  
Ag 22.3977741849 13.6983878115 24.2963024224  
Ag 20.0466268787 18.1102319429 10.2781982258  
Ag 20.0258174656 16.2877168583 12.3735532104  
Ag 22.4163134502 15.6375409483 13.7179562316  
Ag 22.3766899312 17.7023306270 11.8259421759  
Ag 22.3979123918 15.7032584402 26.2478843085  
Ag 20.0013548066 16.3912739136 27.5745176276  
Ag 20.0134070814 18.3554439715 29.5358165870  
Ag 22.3850739381 17.7511391927 28.1494685173  
Ag 20.0848306178 20.0001143704 8.2450454399

Ag 20.0466373594 21.8898465572 10.2784907451  
Ag 22.1310101352 20.0000524018 10.2036889509  
Ag 22.3759043430 22.2969806166 11.8271225377  
Ag 20.0134622734 21.6440236868 29.5356935739  
Ag 22.2527275065 19.9998503697 29.8747894072  
Ag 22.3850887246 22.2479129617 28.1488839849  
Ag 20.0509079971 19.9998215400 31.7517342606  
Ag 20.0257962882 23.7139460026 12.3725202784  
Ag 20.0062574489 25.6111391945 14.3988090901  
Ag 22.4158849354 24.3619718537 13.7187762946  
Ag 22.4110494443 26.3490249084 15.6920410071  
Ag 19.9881387361 25.5392502087 25.5728969013  
Ag 22.3979252743 24.2953890946 26.2472061527  
Ag 22.3981848430 26.3007667343 24.2966292909  
Ag 20.0015400287 23.6084810303 27.5749202921  
Ag 19.9866093899 27.6323523094 16.3010108972  
Ag 19.9676518647 29.7096609620 18.1437025072  
Ag 22.3545972257 28.3339553299 17.6842988362  
Ag 19.9628607164 29.6870440981 21.8761615055  
Ag 22.3480696110 28.3107403639 22.3297790839  
Ag 22.0591696538 29.9243663595 20.0137471581  
Ag 19.9749655082 27.5915575103 23.6984966729  
Ag 19.9328793420 31.7513355006 20.0228801493  
Ag 24.4442397986 13.5445319706 17.6267059989  
Ag 23.8779114852 12.1660264146 20.0063320107  
Ag 24.4467475109 13.5576475345 22.3781725437  
Ag 25.8735178144 14.0847400175 20.0017408708  
Ag 24.4213575372 17.6054723802 13.7574610033  
Ag 24.5654099379 15.4362534550 15.5456805875  
Ag 26.4836777287 15.4724700326 17.6274898209  
Ag 26.3685114281 17.5894381262 15.7661915527  
Ag 26.4952018688 15.4766256909 22.3724040797  
Ag 24.5715491291 15.4575360025 24.4508019374  
Ag 24.4601384428 17.6149893251 26.2538145121  
Ag 26.4017702182 17.5900961469 24.2388626766  
Ag 23.8867263593 19.9996231066 12.3640044757  
Ag 24.4202302676 22.3929844119 13.7587727490  
Ag 25.7023908799 19.9992579593 14.4891852180  
Ag 26.3673936225 22.4090694748 15.7672033130  
Ag 24.4606391475 22.3843103769 26.2537455971  
Ag 25.7660418946 19.9996547243 25.5334782053  
Ag 26.4023431722 22.4091908331 24.2388678813  
Ag 23.9882971775 19.9995608810 27.6862569271  
Ag 24.5640318825 24.5620205378 15.5472802898  
Ag 24.4437839900 26.4548052897 17.6273503412

Ag 26.4829648364 24.5265078602 17.6282868282  
Ag 24.4473553582 26.4421274050 22.3787370316  
Ag 26.4959810019 24.5231662129 22.3727304870  
Ag 25.8734919087 25.9146937675 20.0022270962  
Ag 24.5723422303 24.5419544051 24.4510330249  
Ag 23.8776771539 27.8333444013 20.0067544741  
Ag 28.2641107505 17.6255529351 17.8323343526  
Ag 27.9459329921 15.9164551322 19.9962060049  
Ag 28.2826427187 17.6246881104 22.1598152875  
Ag 30.1322954956 17.7147058178 19.9896625127  
Ag 27.6470767074 19.9994731320 16.4736497654  
Ag 28.2629074768 22.3731238866 17.8334374807  
Ag 29.5929027827 19.9995895896 18.4674546852  
Ag 28.2823065162 22.3741789049 22.1593965762  
Ag 29.6097203917 19.9994351139 21.5215335432  
Ag 30.1324650257 22.2841953826 19.9899554911  
Ag 27.6832635648 19.9994688804 23.5286841638  
Ag 27.9467817535 24.0836596282 19.9964455535  
Ag 31.9111280187 19.9991694683 19.9875477110  
H 20.1765109967 19.6251936620 34.0260000000  
H 20.2798066301 20.3805883709 34.0181900000  
Ag\_g 20.0000000002 36.3599272379 20.0000000001  
Ag\_g 20.0000000001 3.6400727625 19.9999999997  
Ag\_g 20.0000000001 34.3147335794 22.0447127783  
Ag\_g 20.0000000001 5.6852664205 17.9552872216  
Ag\_g 19.9999999995 34.3147335787 17.9552872224  
Ag\_g 20.0000000002 5.6852664205 22.0447127780  
Ag\_g 22.0447127782 34.3147335799 20.0000000004  
Ag\_g 17.9552872204 5.6852664194 19.9999999994  
Ag\_g 17.9552872213 34.3147335811 19.9999999994  
Ag\_g 22.0447127795 5.6852664186 19.9999999999  
Ag\_g 19.9999999995 32.2697596988 24.0898752286  
Ag\_g 20.0000000002 7.7302403035 15.9101247724  
Ag\_g 19.9999999994 32.2697596985 15.9101247727  
Ag\_g 20.0000000000 7.7302403025 24.0898752271  
Ag\_g 22.0448853437 32.2699892044 22.0448853447  
Ag\_g 17.9551146563 7.7300107909 17.9551146562  
Ag\_g 17.9551146573 32.2699892061 17.9551146541  
Ag\_g 17.9551146559 7.7300107935 22.0448853429  
Ag\_g 17.9551146568 32.2699892049 22.0448853450  
Ag\_g 22.0448853443 7.7300107956 22.0448853437  
Ag\_g 22.0448853429 7.7300107929 17.9551146550  
Ag\_g 22.0448853439 32.2699892079 17.9551146549  
Ag\_g 24.0898752281 32.2697596967 20.0000000001  
Ag\_g 15.9101247745 32.2697596934 20.0000000000

Ag-g 15.9101247728 7.7302403046 20.0000000002  
Ag-g 24.0898752264 7.7302403054 19.9999999995  
Ag-g 20.0000000005 30.2248392147 26.1347523812  
Ag-g 20.0000000006 9.7751607834 26.1347523835  
Ag-g 20.0000000006 30.2248392137 13.8652476180  
Ag-g 20.0000000006 9.7751607832 13.8652476180  
Ag-g 22.0445936566 30.2247866818 24.0897975018  
Ag-g 17.9554063471 9.7752133210 15.9102024989  
Ag-g 17.9554063455 9.7752133195 24.0897975021  
Ag-g 22.0445936542 9.7752133204 15.9102024992  
Ag-g 17.9554063445 30.2247866796 15.9102025000  
Ag-g 17.9554063453 30.2247866797 24.0897974995  
Ag-g 22.0445936513 9.7752133210 24.0897975018  
Ag-g 22.0445936524 30.2247866787 15.9102024994  
Ag-g 24.0897974996 30.2247866733 22.0445936546  
Ag-g 15.9102025023 9.7752133271 17.9554063455  
Ag-g 15.9102025011 9.7752133187 22.0445936536  
Ag-g 24.0897974961 9.7752133226 17.9554063472  
Ag-g 15.9102025007 30.2247866746 17.9554063449  
Ag-g 15.9102025027 30.2247866805 22.0445936551  
Ag-g 24.0897975003 9.7752133240 22.0445936563  
Ag-g 24.0897975002 30.2247866818 17.9554063454  
Ag-g 26.1347523776 30.2248392124 19.9999999978  
Ag-g 13.8652476228 9.7751607883 20.0000000010  
Ag-g 13.8652476211 30.2248392137 20.0000000006  
Ag-g 26.1347523773 9.7751607878 20.0000000003  
Ag-g 19.9999999987 28.1798032884 28.1798032932  
Ag-g 19.9999999989 11.8201967102 11.8201967085  
Ag-g 20.0000000008 11.8201967110 28.1798032892  
Ag-g 20.0000000007 28.1798032872 11.8201967114  
Ag-g 22.0448201270 28.1797860789 26.1348574379  
Ag-g 17.9551798725 11.8202139217 13.8651425660  
Ag-g 17.9551798767 11.8202139272 26.1348574367  
Ag-g 22.0448201283 11.8202139220 13.8651425649  
Ag-g 17.9551798735 28.1797860771 13.8651425639  
Ag-g 17.9551798722 28.1797860742 26.1348574371  
Ag-g 22.0448201235 11.8202139241 26.1348574339  
Ag-g 22.0448201257 28.1797860752 13.8651425653  
Ag-g 24.0898252740 28.1796522955 24.0898252754  
Ag-g 15.9101747263 11.8203477115 15.9101747238  
Ag-g 24.0898252668 11.8203477082 15.9101747282  
Ag-g 15.9101747307 11.8203477116 24.0898252694  
Ag-g 15.9101747252 28.1796522985 15.9101747265  
Ag-g 15.9101747263 28.1796522897 24.0898252752  
Ag-g 24.0898252744 11.8203477056 24.0898252741

Ag-g 24.0898252750 28.1796522872 15.9101747239  
Ag-g 28.1798032868 28.1798032858 19.9999999998  
Ag-g 11.8201967121 11.8201967145 19.9999999999  
Ag-g 11.8201967122 28.1798032869 19.9999999965  
Ag-g 28.1798032869 11.8201967140 19.9999999998  
Ag-g 20.0000000017 26.1347523790 30.2248392205  
Ag-g 20.0000000001 13.8652476206 9.7751607802  
Ag-g 19.9999999989 26.1347523791 9.7751607798  
Ag-g 20.0000000006 13.8652476212 30.2248392204  
Ag-g 22.0448201265 26.1348574266 28.1797860830  
Ag-g 17.9551798715 13.8651425744 11.8202139159  
Ag-g 17.9551798733 13.8651425697 28.1797860776  
Ag-g 22.0448201229 13.8651425756 11.8202139166  
Ag-g 17.9551798737 26.1348574239 11.8202139180  
Ag-g 17.9551798741 26.1348574241 28.1797860814  
Ag-g 22.0448201263 13.8651425728 28.1797860780  
Ag-g 22.0448201256 26.1348574270 11.8202139191  
Ag-g 24.0897914419 26.1346882865 26.1346882886  
Ag-g 15.9102085586 13.8653117099 13.8653117128  
Ag-g 15.9102085634 13.8653117176 26.1346882881  
Ag-g 24.0897914401 13.8653117121 13.8653117137  
Ag-g 15.9102085612 26.1346882789 13.8653117045  
Ag-g 15.9102085596 26.1346882855 26.1346882893  
Ag-g 24.0897914405 13.8653117202 26.1346882921  
Ag-g 24.0897914427 26.1346882891 13.8653117097  
Ag-g 26.1346882847 26.1346882780 24.0897914424  
Ag-g 13.8653117208 13.8653117190 15.9102085564  
Ag-g 13.8653117153 13.8653117207 24.0897914451  
Ag-g 26.1346882786 13.8653117212 24.0897914460  
Ag-g 13.8653117137 26.1346882812 15.9102085605  
Ag-g 13.8653117206 26.1346882782 24.0897914476  
Ag-g 26.1346882839 13.8653117173 15.9102085589  
Ag-g 26.1346882786 26.1346882849 15.9102085543  
Ag-g 28.1797860708 26.1348574190 22.0448201284  
Ag-g 11.8202139285 13.8651425811 17.9551798726  
Ag-g 11.8202139253 13.8651425712 22.0448201264  
Ag-g 28.1797860733 13.8651425761 17.9551798711  
Ag-g 11.8202139295 26.1348574213 17.9551798693  
Ag-g 11.8202139246 26.1348574256 22.0448201266  
Ag-g 28.1797860678 13.8651425823 22.0448201280  
Ag-g 28.1797860737 26.1348574285 17.9551798712  
Ag-g 30.2248392141 26.1347523783 19.9999999999  
Ag-g 9.7751607878 13.8652476229 20.0000000010  
Ag-g 30.2248392133 13.8652476217 19.9999999996  
Ag-g 9.7751607870 26.1347523769 20.0000000003

Ag-g 20.0000000008 24.0898752240 32.2697596959  
Ag-g 20.0000000004 15.9101247773 7.7302403048  
Ag-g 19.9999999996 24.0898752237 7.7302403065  
Ag-g 20.0000000003 15.9101247746 32.2697596966  
Ag-g 22.0445936571 24.0897974959 30.2247866769  
Ag-g 17.9554063427 15.9102025065 9.7752133211  
Ag-g 17.9554063463 15.9102025062 30.2247866806  
Ag-g 22.0445936591 15.9102025038 9.7752133227  
Ag-g 17.9554063453 24.0897974972 9.7752133188  
Ag-g 17.9554063414 24.0897974972 30.2247866766  
Ag-g 22.0445936551 15.9102025044 30.2247866806  
Ag-g 22.0445936559 24.0897974982 9.7752133201  
Ag-g 24.0898252755 24.0898252696 28.1796522887  
Ag-g 15.9101747261 15.9101747316 11.8203477094  
Ag-g 15.9101747233 15.9101747296 28.1796522848  
Ag-g 24.0898252750 15.9101747329 11.8203477116  
Ag-g 15.9101747221 24.0898252734 11.8203477154  
Ag-g 15.9101747267 24.0898252696 28.1796522895  
Ag-g 24.0898252769 15.9101747280 28.1796522852  
Ag-g 24.0898252757 24.0898252704 11.8203477139  
Ag-g 26.1346882899 24.0897914335 26.1346882894  
Ag-g 13.8653117126 15.9102085678 13.8653117171  
Ag-g 13.8653117166 15.9102085659 26.1346882890  
Ag-g 26.1346882899 15.9102085663 13.8653117159  
Ag-g 13.8653117193 24.0897914310 13.8653117096  
Ag-g 13.8653117127 24.0897914345 26.1346882818  
Ag-g 26.1346882832 15.9102085674 26.1346882888  
Ag-g 26.1346882868 24.0897914326 13.8653117185  
Ag-g 28.1796522882 24.0898252675 24.0898252717  
Ag-g 11.8203477072 15.9101747332 15.9101747288  
Ag-g 11.8203477132 15.9101747310 24.0898252730  
Ag-g 28.1796522891 15.9101747335 15.9101747278  
Ag-g 11.8203477069 24.0898252679 15.9101747290  
Ag-g 11.8203477126 24.0898252684 24.0898252741  
Ag-g 28.1796522942 15.9101747317 24.0898252675  
Ag-g 28.1796522932 24.0898252681 15.9101747295  
Ag-g 30.2247866730 24.0897974947 22.0445936525  
Ag-g 9.7752133198 15.9102025043 17.9554063460  
Ag-g 9.7752133271 15.9102025041 22.0445936535  
Ag-g 30.2247866792 15.9102025040 17.9554063473  
Ag-g 9.7752133263 24.0897974959 17.9554063462  
Ag-g 9.7752133212 24.0897974949 22.0445936540  
Ag-g 30.2247866755 15.9102025030 22.0445936529  
Ag-g 30.2247866802 24.0897974968 17.9554063481  
Ag-g 32.2697596970 24.0898752283 19.9999999996

Ag-g 7.7302403048 15.9101247730 20.0000000000  
Ag-g 32.2697596949 15.9101247722 20.0000000003  
Ag-g 7.7302403037 24.0898752281 20.0000000007  
Ag-g 20.0000000003 22.0447127788 34.3147335814  
Ag-g 19.9999999994 17.9552872216 5.6852664166  
Ag-g 19.9999999995 22.0447127787 5.6852664167  
Ag-g 20.0000000000 17.9552872221 34.3147335826  
Ag-g 22.0448853429 22.0448853444 32.2699892120  
Ag-g 17.9551146581 17.9551146580 7.7300107904  
Ag-g 17.9551146533 17.9551146538 32.2699892103  
Ag-g 22.0448853411 17.9551146591 7.7300107901  
Ag-g 17.9551146552 22.0448853440 7.7300107898  
Ag-g 17.9551146577 22.0448853411 32.2699892121  
Ag-g 22.0448853440 17.9551146549 32.2699892090  
Ag-g 22.0448853419 22.0448853442 7.7300107894  
Ag-g 24.0897974981 22.0445936576 30.2247866823  
Ag-g 15.9102025039 17.9554063454 9.7752133225  
Ag-g 15.9102025037 17.9554063467 30.2247866789  
Ag-g 24.0897974985 17.9554063420 9.7752133211  
Ag-g 15.9102025030 22.0445936539 9.7752133181  
Ag-g 15.9102025030 22.0445936551 30.2247866779  
Ag-g 24.0897974983 17.9554063472 30.2247866839  
Ag-g 24.0897974988 22.0445936560 9.7752133159  
Ag-g 26.1348574259 22.0448201266 28.1797860826  
Ag-g 13.8651425776 17.9551798745 11.8202139164  
Ag-g 13.8651425716 17.9551798759 28.1797860763  
Ag-g 26.1348574237 17.9551798739 11.8202139170  
Ag-g 13.8651425727 22.0448201271 11.8202139227  
Ag-g 13.8651425791 22.0448201228 28.1797860812  
Ag-g 26.1348574239 17.9551798729 28.1797860788  
Ag-g 26.1348574260 22.0448201271 11.8202139165  
Ag-g 28.1797860764 22.0448201272 26.1348574335  
Ag-g 11.8202139196 17.9551798737 13.8651425650  
Ag-g 11.8202139314 17.9551798760 26.1348574329  
Ag-g 28.1797860732 17.9551798745 13.8651425676  
Ag-g 11.8202139315 22.0448201241 13.8651425633  
Ag-g 11.8202139242 22.0448201256 26.1348574321  
Ag-g 28.1797860731 17.9551798741 26.1348574361  
Ag-g 28.1797860742 22.0448201252 13.8651425653  
Ag-g 30.2247866814 22.0445936529 24.0897974994  
Ag-g 9.7752133244 17.9554063466 15.9102024979  
Ag-g 9.7752133195 17.9554063459 24.0897974991  
Ag-g 30.2247866767 17.9554063449 15.9102024985  
Ag-g 9.7752133163 22.0445936561 15.9102024999  
Ag-g 9.7752133240 22.0445936529 24.0897975008

Ag\_g 30.2247866824 17.9554063442 24.0897974984  
Ag\_g 30.2247866784 22.0445936574 15.9102024986  
Ag\_g 32.2699892056 22.0448853433 22.0448853448  
Ag\_g 7.7300107925 17.9551146566 17.9551146549  
Ag\_g 7.7300107952 17.9551146576 22.0448853448  
Ag\_g 32.2699892071 17.9551146580 17.9551146560  
Ag\_g 7.7300107940 22.0448853442 17.9551146552  
Ag\_g 7.7300107951 22.0448853436 22.0448853452  
Ag\_g 32.2699892056 17.9551146574 22.0448853450  
Ag\_g 32.2699892082 22.0448853442 17.9551146554  
Ag\_g 34.3147335805 22.0447127785 19.9999999986  
Ag\_g 5.6852664191 17.9552872209 20.0000000000  
Ag\_g 34.3147335807 17.9552872211 19.9999999985  
Ag\_g 5.6852664193 22.0447127793 19.9999999990  
Ag\_g 19.9999999999 19.9999999993 36.3599272400  
Ag\_g 22.0447127801 19.9999999999 34.3147335798  
Ag\_g 17.9552872209 19.9999999995 5.6852664181  
Ag\_g 22.0447127789 19.9999999996 5.6852664157  
Ag\_g 17.9552872205 20.0000000001 34.3147335821  
Ag\_g 24.0898752245 20.0000000004 32.2697596939  
Ag\_g 15.9101247771 19.9999999985 7.7302403061  
Ag\_g 24.0898752250 19.9999999998 7.7302403027  
Ag\_g 15.9101247763 20.0000000004 32.2697596933  
Ag\_g 26.1347523809 19.9999999988 30.2248392180  
Ag\_g 13.8652476188 19.9999999998 9.7751607796  
Ag\_g 13.8652476202 19.9999999993 30.2248392194  
Ag\_g 26.1347523816 19.9999999998 9.7751607832  
Ag\_g 28.1798032888 20.0000000009 28.1798032879  
Ag\_g 11.8201967113 19.9999999999 11.8201967101  
Ag\_g 28.1798032868 19.9999999993 11.8201967078  
Ag\_g 11.8201967104 20.0000000000 28.1798032899  
Ag\_g 30.2248392133 20.0000000003 26.1347523801  
Ag\_g 9.7751607843 19.9999999999 26.1347523823  
Ag\_g 9.7751607835 20.0000000006 13.8652476171  
Ag\_g 30.2248392174 19.9999999995 13.8652476159  
Ag\_g 32.2697596974 19.9999999998 24.0898752286  
Ag\_g 7.7302403039 19.9999999992 15.9101247741  
Ag\_g 7.7302403014 20.0000000008 24.0898752297  
Ag\_g 32.2697596975 19.9999999997 15.9101247742  
Ag\_g 34.3147335795 20.0000000000 22.0447127785  
Ag\_g 5.6852664202 20.0000000003 22.0447127783  
Ag\_g 5.6852664190 19.9999999996 17.9552872207  
Ag\_g 34.3147335809 19.9999999999 17.9552872212  
Ag\_g 36.3599272377 20.0000000001 19.9999999995  
Ag\_g 3.6400727625 20.0000000002 20.0000000000

Ag-g 26.1348574258 11.8202139258 22.0448201273  
Ag-g 26.1348574226 11.8202139274 17.9551798722  
Ag-g 26.1348574263 28.1797860727 22.0448201280  
Ag-g 26.1348574217 28.1797860719 17.9551798664  
Ag-g 13.8651425742 28.1797860754 22.0448201245  
Ag-g 13.8651425764 28.1797860705 17.9551798734  
Ag-g 13.8651425805 11.8202139311 22.0448201314  
Ag-g 13.8651425758 11.8202139260 17.9551798718  
Ag-g 20.0000000000 20.0000000003 3.6400727625
